# Supplementary material for: PheNetic: network-based interpretation of unstructured gene lists in E. coli
Source: Royal Society of Chemistry journal article supplement (doi:10.1039/c3mb25551d), 2013-03-26
Supplement: c3mb25551d_2.pdf [file c3mb25551d_2.pdf]

Table - Genes found to be differentially expressed under acidic conditions in at least 2 differential expression experiments

dhal  
serc  
cpxp  
fima  
flgg  
fliy  
malk  
cpxa  
acek  
nhab  
deoc  
oppf  
gatc  
maa  
srld  
malp  
typa  
sdhd  
deob  
ymgd  
yghj  
argo  
nuoi  
srlr  
ygib  
gatd  
azor  
ycca  
sdhb  
ivbl  
hdea

yjbq  
cyob  
pyrb  
glta  
alat  
nuoh  
many  
sucb  
purh  
sucd  
yehu  
hish  
galf  
mdab  
male  
yhcn  
ftnb  
flik  
rpli  
tnac  
stha  
yffb  
ibpb  
icd  
osmb  
yaha  
nfsa  
sdac  
guab  
mqo  
rfe  
kdsa  
tnaa

yeaq  
pgi  
nupg  
gpma  
htpx  
tgt  
lysu  
gaty  
ygdq  
bdm  
rfbc  
hisc  
hflx  
oppd  
ygdr  
sped  
ycfs  
srle  
bord  
nuoc  
riba  
sdha  
rnk  
nrdd  
pita  
hflk  
ydeh  
taba  
tdcb  
ybak  
sra  
yjej  
yead

flgf  
ycei  
alx  
menb  
yjiy  
glgs  
ndk  
mutl  
malq  
fuck  
yhbj  
mdtj  
ispe  
rcsa  
ilvg\_2  
hupa  
yfid  
pdxk  
flia  
yiep  
aspc  
ompf  
bsma  
hslu  
tehb  
glpx  
hisi  
lgt  
ykga  
yiis  
gcvt  
ycic  
cyda

cvpa  
pnta  
ycfp  
nemr  
potd  
aspa  
yohk  
tsx  
rbsc  
dham  
dsba  
prov  
purm  
udp  
lamb  
pura  
npr  
edd  
ubib  
lysc  
marr  
add  
srlb  
ybhb  
clpb  
thrc  
menf  
yodc  
tusb  
gdha  
yeac  
cyod  
acna

succ  
lldp  
hlpa  
ygic  
cyoc  
yeig  
uspd  
yagu  
flgd  
mara  
reca  
ynfd  
gapc\_2  
ppsa  
mdod  
zntr  
spy  
yafe  
puru  
gloa  
acee  
ygin  
cydb  
nuol  
nema  
ylac  
yajc  
cada  
ompt  
ydiz  
lldd  
acnb  
ydih

yjju  
cyoa  
yebe  
manz  
oppb  
alau  
yqgb  
deoa  
rbsb  
dada  
rcnb  
pdx  
tpia  
mrp  
gatz  
grxb  
yqhd  
gnd  
mtfa  
slt  
nlpa  
dnaj  
secd  
fuma  
malg  
ygau  
ykgf  
malf  
rsd  
yham  
yief  
pdxh  
mltd

rpoe  
rsea  
atpc  
artq  
htpg  
tpx  
fpr  
ygah  
glpf  
apag  
ygiw  
nuok  
oppc  
yjdm  
gata  
tas  
gcvh  
rdoa  
hsdr  
mcrb  
tusd  
nade  
metn  
gpmm  
psts  
gapc\_1  
suca  
tdcc  
rbsd  
sdab  
sdhc  
phea  
ygdi



nmpc  
mltc  
yiee  
trpb  
pppa  
acrr  
rbsa  
deod  
manx  
alaa  
trec  
yfdi  
fadl  
dps  
idi  
ilvg\_1  
atpf  
malt  
glpa  
fimg  
ygge  
wrba  
alda  
lysp  
cpxr  
gltg  
fdog  
prs  
yqjd  
oppa  
gltb  
biob  
hisf

pfbk  
ygbe  
cfa  
acef  
hdeb  
ilvn  
deda  
lpxd  
tnab  
ycii  
grol  
tata  
ygaz  
atpa  
yqjc  
dhak  
nuog  
flgc  
ychh  
hslv  
gatb  
fucr  
trmi  
hha  
ygis  
nrdg  
dapb  
flge  
malm  
dnak  
bcse  
pmrd  
galp

cdd  
ppia  
gros  
flil  
atph  
folp  
yheo  
hslj  
flgb  
rnb  
nrdf  
raia  
katg  
yghg  
sdaa  
metk  
cyaa  
treb  
ybjn  
srla  
fdoh
