# Supplementary material for: PheNetic: network-based interpretation of unstructured gene lists in E. coli
Source: Royal Society of Chemistry journal article supplement (doi:10.1039/c3mb25551d), 2013-03-26
Supplement: c3mb25551d_3.pdf [file c3mb25551d_3.pdf]

Table - Overview of the smallest sub-network to select to retrieve the given gene.

| gene_name | PheNetic | eResponse | Expression-based ranking |
|-----------|----------|-----------|--------------------------|
| hdeB      | 7        | 56        | 32                       |
| gadC      | 7        | 19        | 11                       |
| gadW      | 7        | 23        | 178                      |
| crp       | 7        | 19        | 281                      |
| hns       | 7        | 56        | 65                       |
| hdeA      | 7        | 56        | 75                       |
| gadA      | 7        | 19        | 23                       |
| gadX      | 8        | 56        | 93                       |
| gatB      | 9        | 56        | 47                       |
| gadE      | 15       | 56        | 85                       |
| phoP      | 15       | 83        | 11                       |
| mtr       | 15       | 83        | 23                       |
| gadB      | 15       | 19        | 186                      |
| ihfB      | 15       | 56        | 58                       |
| dctR      | 15 NF    |           | 117                      |
| mdtE      | 21 NF    |           | 254                      |
| fliC      | 21       | 56        | 11                       |
| gatA      | 21 NF    |           | 111                      |
| gatC      | 21 NF    |           | 93                       |
| aceE      | 21       | 56        | 418                      |
| ompT      | 21 NF    |           | 11                       |
| slp       | 27 NF    |           | 229                      |
| phoQ      | 27       | 83        | 75                       |
| fis       | 27       | 19        | 85                       |
| cysU      | 27 NF    |           | 117                      |
| marA      | 27       | 90        | 1244                     |
| sdhD      | 27 NF    |           | 125                      |
| hchA      | 40 NF    |           | 326                      |
| carA      | 40       | 19        | 11                       |
| hupA      | 40 NF    |           | 1138                     |
| leuO      | 40 NF    |           | 2308                     |
| rbsD      | 40 NF    |           | 204                      |
| malE      | 40 NF    |           | 196                      |
| yciF      | 40 NF    |           | 263                      |
| dsrA      | 40 NF    | NF        |                          |
| ompF      | 40 NF    |           | 117                      |
| rpsB      | 40 NF    |           | 137                      |
| rpoS      | 40       | 19        | 85                       |
| rcaA      | 40       | 130       | 546                      |
| yciG      | 40 NF    |           | 336                      |
| mglB      | 51 NF    |           | 320                      |
| ybjG      | 51 NF    |           | 47                       |
| gpmA      | 51       | 19        | 58                       |
| hupB      | 51       | 83        | 768                      |
| sucC      | 51 NF    |           | 238                      |
| sodA      | 51       | 83        | 65                       |
| treB      | 51 NF    |           | 186                      |
| tnaA      | 51       | 56        | 52                       |

|      |       |     |      |
|------|-------|-----|------|
| sdhC | 51    | 23  | 11   |
| osmB | 51 NF |     | 101  |
| sucD | 51    | 19  | 32   |
| garL | 96    | 110 | 47   |
| cadB | 96    | 129 | 582  |
| cyoE | 96 NF |     | 154  |
| cyoA | 96    | 19  | 23   |
| hlyE | 96 NF |     | 492  |
| flhD | 96    | 83  | 604  |
| hdfR | 96 NF |     | 2627 |
| trpE | 96    | 135 | 11   |
| cyoC | 96    | 23  | 32   |
| flgG | 96 NF |     | 39   |
| dcyD | 96 NF |     | 1320 |
| sucB | 96    | 56  | 11   |
| narJ | 96    | 19  | 65   |
| fur  | 96    | 110 | 1540 |
| infB | 96    | 132 | 178  |
| adhE | 96 NF |     | 111  |
| cadA | 96    | 100 | 269  |
| gatZ | 96    | 56  | 65   |
| grpE | 96 NF |     | 1259 |
| ygjG | 96 NF |     | 162  |
| flgD | 96    | 119 | 39   |
| narL | 96    | 67  | 711  |
| yrbL | 96 NF |     | 93   |
| ihfA | 96    | 83  | 976  |
| rpoD | 96    | 100 | 1213 |
| tdcE | 96    | 23  | 23   |
| hdeD | 96 NF |     | 398  |
| sdhA | 96    | 19  | 75   |
| rplL | 96 NF |     | 568  |
| lamB | 96 NF |     | 162  |
| flgB | 96    | 83  | 23   |
| yacL | 96    | 110 | 1559 |
| oxyR | 96    | 67  | 2305 |
| carB | 96    | 19  | 58   |
| ssb  | 96    | 56  | 1470 |
| cyoB | 96    | 19  | 39   |
| rmf  | 96 NF |     | 111  |
| queC | 96 NF |     | 2283 |
| flu  | 96    | 67  | 23   |
| rpoH | 96    | 83  | 1084 |
| flhC | 96    | 100 | 361  |
| tnaC | 96 NF |     | 510  |
| narX | 96    | 67  | 154  |
| flgC | 96    | 100 | 23   |
| rplC | 96    | 67  | 304  |
| rplA | 96 NF |     | 814  |
| glnA | 96 NF |     | 475  |

|      |        |     |      |
|------|--------|-----|------|
| yhiD | 97 NF  |     | 647  |
| trpL | 99     | 135 | 23   |
| rpsO | 99 NF  |     | 821  |
| micF | 99 NF  | NF  |      |
| ompR | 99 NF  |     | 1088 |
| omrB | 99 NF  | NF  |      |
| qseB | 100 NF | NF  |      |
| dnaK | 101    | 56  | 101  |
| sucA | 104    | 56  | 630  |
| uraA | 104    | 137 | 52   |
| rpsE | 104 NF |     | 1180 |
| borD | 106 NF |     | 154  |
| gatY | 106 NF |     | 147  |
| sra  | 107 NF |     | 93   |
| rhaS | 108 NF |     | 2283 |
| yeeX | 109 NF |     | 817  |
| tdcF | 110 NF |     | 111  |
| nirB | 111    | 19  | 58   |
| yjiT | 112    | 100 | 47   |
| cspA | 117 NF |     | 1300 |
| yhjH | 117    | 115 | 32   |
| fliZ | 117    | 115 | 39   |
| marR | 117 NF |     | 661  |
| cspB | 117 NF | NF  |      |
| otsB | 118 NF |     | 213  |
| caiF | 119 NF |     | 221  |
| trpD | 120    | 132 | 39   |
| sodB | 125 NF |     | 635  |
| mdtF | 125 NF |     | 773  |
| rpsA | 125 NF |     | 758  |
| helD | 125 NF |     | 2190 |
| narI | 125 NF |     | 170  |
| nusA | 127    | 110 | 368  |
| cfa  | 127 NF |     | 229  |
| narH | 128 NF |     | 178  |
| ydil | 130 NF |     | 1601 |
| treC | 130 NF |     | 125  |
| nuoE | 132 NF |     | 333  |
| manZ | 132 NF |     | 666  |
| yaG  | 133 NF |     | 204  |
| melR | 134 NF |     | 368  |
| nuoB | 139 NF |     | 111  |
| aceB | 139 NF |     | 137  |
| nuoK | 139 NF |     | 238  |
| kdgR | 139 NF |     | 1194 |
| rpoA | 139    | 100 | 546  |
| sdhB | 140    | 19  | 32   |
| rplB | 143    | 56  | 433  |
| adiA | 143    | 56  | 557  |
| tdcC | 143    | 90  | 39   |

|      |        |     |      |
|------|--------|-----|------|
| mpl  | 144 NF |     | 241  |
| yihU | 145 NF |     | 433  |
| uvrC | 149    | 56  | 2438 |
| pepA | 149    | 56  | 1045 |
| tyrR | 149 NF |     | 2060 |
| zraR | 149 NF |     | 673  |
| rpoB | 153    | 120 | 858  |
| garP | 153 NF |     | 85   |
| fliL | 153 NF |     | 111  |
| fliA | 153    | 115 | 32   |
| ansB | 155    | 19  | 58   |
| degP | 155 NF |     | 621  |
| cyoD | 157    | 56  | 111  |
| tdcA | 157 NF |     | 154  |
| rplD | 158 NF |     | 333  |
| garR | 159 NF |     | 125  |
| dcuA | 164 NF |     | 764  |
| srlR | 164    | 83  | 738  |
| astC | 164 NF |     | 93   |
| atpF | 164    | 90  | 52   |
| rpoN | 164    | 90  | 2263 |
| gyrA | 165 NF |     | 117  |
| ftnA | 168 NF |     | 154  |
| aceK | 168 NF |     | 784  |
| flgF | 168 NF |     | 213  |
| narG | 169    | 23  | 47   |
| trpC | 171    | 124 | 75   |
| tdcB | 171    | 110 | 52   |
| yeaH | 175 NF |     | 247  |
| groS | 175 NF |     | 709  |
| cbpA | 175 NF |     | 345  |
| glnG | 175 NF |     | 1655 |
| speE | 178    | 100 | 75   |
| atpH | 178 NF |     | 304  |
| qseC | 178 NF |     | 1843 |
| aceA | 181 NF |     | 320  |
| fumB | 181 NF |     | 125  |
| flgN | 181 NF |     | 125  |
| rpsF | 185 NF |     | 288  |
| trpR | 185 NF |     | 2242 |
| nirD | 185 NF |     | 497  |
| rcsB | 185 NF |     | 1800 |
| hyaB | 187 NF |     | 861  |
| appY | 187 NF |     | 186  |
| rpoC | 190    | 119 | 247  |
| dmsA | 190 NF |     | 170  |
| acs  | 190 NF |     | 162  |
| lexA | 194 NF |     | 492  |
| ybaS | 194    | 56  | 147  |
| gatD | 194 NF |     | 428  |

|      |        |     |      |
|------|--------|-----|------|
| arcA | 194    | 83  | 1601 |
| pgaD | 200 NF |     | 615  |
| mtn  | 200    | 19  | 32   |
| nhaR | 200 NF |     | 2024 |
| manY | 200 NF |     | 615  |
| ada  | 200 NF |     | 2146 |
| sufB | 200 NF |     | 468  |
| aceF | 207 NF |     | 288  |
| lsrC | 207 NF |     | 260  |
| yhcO | 207 NF |     | 996  |
| aspA | 207 NF |     | 438  |
| aldB | 207 NF |     | 247  |
| pdhR | 207 NF |     | 409  |
| mgrB | 207 NF |     | 254  |
| hisM | 210 NF |     | 527  |
| flgE | 210    | 119 | 32   |
| alkA | 210 NF |     | 1241 |
| narP | 214 NF |     | 858  |
| dctA | 214 NF |     | 758  |
| fecC | 214 NF |     | 1045 |
| lldD | 219 NF |     | 101  |
| kdpB | 219 NF |     | 137  |
| gabD | 219 NF |     | 130  |
| rstA | 219 NF |     | 722  |
| ynfF | 219    | 56  | 75   |
| pck  | 226 NF |     | 745  |
| xylF | 226 NF |     | 361  |
| putP | 226 NF |     | 516  |
| garD | 226 NF |     | 11   |
| flgA | 226 NF |     | 85   |
| upp  | 226    | 137 | 75   |
| speD | 226 NF |     | 241  |
| gpt  | 229 NF |     | 170  |
| rpml | 229 NF |     | 294  |
| rbsR | 229 NF |     | 656  |
| crl  | 232 NF |     | 178  |
| srlE | 232 NF |     | 263  |
| aldA | 232 NF |     | 229  |
| glcG | 234 NF |     | 357  |
| tdcD | 234    | 83  | 78   |
| lpd  | 243    | 67  | 745  |
| yhcH | 243 NF |     | 130  |
| baeS | 243 NF |     | 2689 |
| narK | 243 NF |     | 178  |
| hemL | 243 NF |     | 850  |
| dmsB | 243 NF |     | 93   |
| malM | 243 NF |     | 992  |
| queA | 243 NF |     | 497  |
| astA | 243 NF |     | 304  |
| yjdA | 248 NF |     | 93   |

|       |        |     |      |
|-------|--------|-----|------|
| proV  | 248 NF |     | 724  |
| poxB  | 248 NF |     | 368  |
| flgM  | 248    | 83  | 75   |
| osmC  | 248 NF |     | 497  |
| actP  | 256 NF |     | 269  |
| cheA  | 256    | 90  | 65   |
| lrp   | 256 NF |     | 843  |
| dadA  | 256 NF |     | 125  |
| guaB  | 256 NF |     | 1107 |
| ttdB  | 256 NF |     | 196  |
| ygiF  | 256 NF |     | 2378 |
| rluB  | 256    | 125 | 2324 |
| ynfE  | 266 NF |     | 170  |
| frdB  | 266    | 67  | 47   |
| artI  | 266 NF |     | 610  |
| atpA  | 266    | 90  | 564  |
| pheA  | 266 NF |     | 162  |
| lon   | 266 NF |     | 294  |
| cirA  | 266 NF |     | 2201 |
| malT  | 266 NF |     | 260  |
| fliI  | 266 NF |     | 221  |
| tar   | 266 NF |     | 85   |
| cydB  | 275 NF |     | 213  |
| nikD  | 275 NF |     | 178  |
| pyrF  | 275 NF |     | 288  |
| manX  | 275 NF |     | 700  |
| astD  | 275 NF |     | 333  |
| dppA  | 275 NF |     | 147  |
| rnr   | 275 NF |     | 645  |
| putA  | 275 NF |     | 273  |
| udp   | 275 NF |     | 391  |
| rhaT  | 287 NF |     | 451  |
| tufB  | 287 NF |     | 2442 |
| paaD  | 287 NF |     | 170  |
| paaA  | 287 NF |     | 178  |
| galT  | 287 NF |     | 943  |
| fbaB  | 287 NF |     | 162  |
| ydhV  | 287 NF |     | 196  |
| mgIA  | 287 NF |     | 546  |
| galS  | 287 NF |     | 1814 |
| rpIO  | 287 NF |     | 590  |
| paaX  | 287 NF |     | 1883 |
| rpIQ  | 287 NF |     | 510  |
| mnmeE | 311 NF |     | 269  |
| tnaB  | 311 NF |     | 333  |
| cadC  | 311    | 129 | 2052 |
| preA  | 311 NF | NF  |      |
| hyfE  | 311 NF |     | 368  |
| rpoZ  | 311    | 133 | 661  |
| casC  | 311 NF | NF  |      |

|      |        |    |      |
|------|--------|----|------|
| secA | 311 NF |    | 1559 |
| rpIS | 311 NF |    | 1343 |
| casE | 311 NF | NF |      |
| fecD | 311 NF |    | 557  |
| glnH | 311 NF |    | 186  |
| hrpA | 311 NF |    | 2050 |
| casA | 311 NF | NF |      |
| entC | 311 NF |    | 982  |
| casB | 311 NF | NF |      |
| cas1 | 311 NF | NF |      |
| yciU | 311 NF |    | 170  |
| preT | 311 NF | NF |      |
| smpB | 311 NF |    | 444  |
| dusB | 311 NF |    | 475  |
| flxA | 311 NF |    | 196  |
| casD | 311 NF | NF |      |
| ybeD | 325 NF |    | 463  |
| nac  | 325 NF |    | 2232 |
| codB | 325 NF |    | 247  |
| yahA | 325 NF |    | 273  |
| ycgF | 325 NF |    | 2516 |
| ybjP | 325 NF |    | 546  |
| glcC | 325 NF |    | 1287 |
| cra  | 325 NF | NF |      |
| kdpA | 325 NF |    | 418  |
| psiF | 325 NF |    | 582  |
| frdC | 325 NF |    | 254  |
| ompX | 325 NF |    | 546  |
| frdA | 325    | 67 | 65   |
| glcD | 325 NF |    | 451  |
| fliS | 336 NF |    | 111  |
| pyrD | 336 NF |    | 137  |
| rbsB | 336 NF |    | 247  |
| cdd  | 336 NF |    | 1084 |
| rnb  | 336 NF |    | 345  |
| hfq  | 336 NF |    | 352  |
| tusA | 336 NF | NF |      |
| hybB | 336 NF |    | 229  |
| osmE | 336 NF |    | 610  |
| fucO | 336 NF |    | 386  |
| rpsC | 336 NF |    | 294  |
| proX | 346 NF |    | 971  |
| pgm  | 346 NF |    | 333  |
| ulaB | 346 NF |    | 497  |
| otsA | 346 NF |    | 590  |
| yhdT | 346 NF |    | 535  |
| ybaT | 346 NF |    | 729  |
| srlA | 346    | 67 | 78   |
| yfiD | 346 NF |    | 130  |
| rseA | 346 NF |    | 418  |

|      |        |     |      |
|------|--------|-----|------|
| ybcJ | 346 NF |     | 2513 |
| ybdR | 346 NF |     | 468  |
| yojI | 362 NF |     | 733  |
| nrfB | 362 NF |     | 1067 |
| sufA | 362 NF |     | 409  |
| stpA | 362 NF |     | 221  |
| bdm  | 362 NF |     | 154  |
| dosC | 362 NF | NF  |      |
| ydhW | 362 NF |     | 263  |
| frdD | 362 NF |     | 238  |
| glcB | 362 NF |     | 196  |
| hemN | 362 NF |     | 457  |
| iscR | 362 NF |     | 170  |
| rplM | 362 NF |     | 260  |
| dusC | 362 NF |     | 2673 |
| nuoM | 362 NF |     | 375  |
| hisJ | 362 NF |     | 375  |
| ybjX | 362 NF |     | 147  |
| fliD | 371    | 115 | 39   |
| yfgC | 371 NF |     | 1309 |
| focA | 371 NF |     | 590  |
| cheW | 371    | 56  | 32   |
| nuoN | 371 NF |     | 313  |
| treR | 371 NF |     | 2433 |
| flgH | 371 NF |     | 281  |
| ompA | 371 NF |     | 817  |
| cobS | 371 NF |     | 304  |
| psiE | 371 NF |     | 1540 |
| nirC | 393 NF |     | 1019 |
| glmS | 393 NF |     | 333  |
| hypE | 393 NF |     | 345  |
| lhgO | 393 NF | NF  |      |
| torR | 393 NF |     | 1819 |
| fhIA | 393 NF |     | 409  |
| ompW | 393 NF |     | 96   |
| fnr  | 393 NF |     | 313  |
| nrdD | 393 NF |     | 294  |
| rfaZ | 393 NF |     | 475  |
| cysJ | 393 NF |     | 463  |
| nagC | 393 NF |     | 953  |
| ydeO | 393 NF |     | 2649 |
| envZ | 393 NF |     | 2594 |
| rstB | 393 NF |     | 2450 |
| pyrC | 393 NF |     | 229  |
| mdoG | 393 NF |     | 320  |
| trpB | 393 NF |     | 254  |
| glpK | 393 NF |     | 313  |
| aer  | 393 NF |     | 213  |
| fabA | 393    | 110 | 345  |
| pflB | 393    | 110 | 661  |



|      |        |     |      |
|------|--------|-----|------|
| viaN | 428 NF |     | 186  |
| hypA | 428 NF |     | 352  |
| fumA | 428 NF |     | 754  |
| acnB | 428 NF |     | 850  |
| csgA | 428 NF |     | 779  |
| trmA | 428 NF |     | 1584 |
| chiA | 428 NF |     | 715  |
| folK | 428 NF |     | 850  |
| cpxR | 428 NF |     | 1809 |
| yedW | 428 NF |     | 1880 |
| cydA | 428 NF |     | 186  |
| hybA | 428 NF |     | 386  |
| paaB | 428 NF |     | 1024 |
| ybhK | 428 NF |     | 2505 |
| fucA | 428 NF |     | 487  |
| proW | 428 NF |     | 635  |
| sdaB | 428 NF |     | 130  |
| pgi  | 428 NF |     | 904  |
| rimK | 428 NF |     | 1316 |
| dcuR | 428 NF |     | 1479 |
| ndh  | 428 NF |     | 635  |
| cysH | 428 NF |     | 428  |
| zraS | 428 NF |     | 1957 |
| yedV | 428 NF |     | 692  |
| ydhT | 428 NF |     | 764  |
| hflD | 428 NF |     | 487  |
| yhiM | 428 NF |     | 557  |
| mhpR | 428 NF |     | 564  |
| tig  | 428    | 56  | 47   |
| sdaC | 428 NF |     | 304  |
| csgD | 428 NF |     | 2463 |
| ycgR | 428 NF |     | 101  |
| msrA | 428 NF |     | 988  |
| tdcG | 428 NF |     | 451  |
| rbfA | 464 NF |     | 386  |
| glnL | 464 NF |     | 924  |
| nuoC | 464 NF |     | 487  |
| evgA | 464 NF |     | 557  |
| ptrA | 464 NF |     | 883  |
| rpmB | 464 NF |     | 940  |
| yhdY | 464 NF |     | 683  |
| paaF | 464 NF |     | 288  |
| phoB | 464 NF |     | 1256 |
| tap  | 464 NF |     | 130  |
| katG | 464 NF |     | 535  |
| yedQ | 464 NF |     | 956  |
| fliT | 464 NF |     | 238  |
| tufA | 464    | 129 | 2441 |
| katE | 464 NF |     | 602  |
| ydiH | 464 NF |     | 375  |

|      |        |     |      |
|------|--------|-----|------|
| phnI | 464 NF |     | 503  |
| hypC | 464 NF |     | 294  |
| aroH | 464 NF |     | 101  |
| phoU | 464 NF |     | 656  |
| ttdA | 464 NF |     | 238  |
| acrR | 464 NF |     | 204  |
| rimM | 464 NF |     | 444  |
| xylR | 464 NF |     | 959  |
| basR | 464 NF |     | 2277 |
| mgtA | 464 NF |     | 304  |
| ygeW | 464 NF |     | 260  |
| phoH | 464 NF |     | 247  |
| gabT | 464 NF |     | 1354 |
| yeaG | 464 NF |     | 750  |
| cysP | 464 NF |     | 345  |
| talA | 464 NF |     | 645  |
| dps  | 464 NF |     | 519  |
| paaE | 464 NF |     | 336  |
| xylG | 464 NF |     | 908  |
| yjhG | 464 NF |     | 564  |
| ahpF | 518 NF |     | 773  |
| rutR | 518 NF |     | 1587 |
| cspD | 518 NF |     | 1099 |
| ilvE | 518 NF |     | 898  |
| malG | 518 NF |     | 1084 |
| cpxA | 518 NF |     | 1859 |
| nuoG | 518 NF |     | 863  |
| nrfC | 518 NF |     | 1408 |
| sufD | 518 NF |     | 645  |
| ribE | 518 NF |     | 221  |
| pnp  | 518 NF |     | 1419 |
| atpB | 518 NF |     | 307  |
| dnaA | 518 NF |     | 1783 |
| pykA | 518 NF |     | 1412 |
| ndk  | 518    | 56  | 11   |
| paaG | 518 NF |     | 433  |
| rpsD | 518 NF |     | 1662 |
| raiA | 518 NF |     | 418  |
| dppF | 518 NF |     | 700  |
| cysD | 518 NF |     | 147  |
| oppA | 518 NF |     | 147  |
| appB | 518 NF |     | 1718 |
| ydhX | 518 NF |     | 550  |
| viaM | 518 NF |     | 578  |
| maa  | 518 NF |     | 738  |
| mreB | 518    | 110 | 229  |
| gabP | 518 NF |     | 1012 |
| paaC | 518 NF |     | 451  |
| gltI | 518 NF |     | 546  |
| nfi  | 518 NF |     | 2098 |

|      |        |      |
|------|--------|------|
| nuoF | 518 NF | 1180 |
| nrdI | 518 NF | 1071 |
| fdnI | 518 NF | 1203 |
| nrfE | 518 NF | 966  |
| hyfR | 518 NF | 2702 |
| uspB | 518 NF | 409  |
| pstA | 518 NF | 1180 |
| msyB | 518 NF | 940  |
| deaD | 518 NF | 375  |
| flgL | 518 NF | 254  |
| trg  | 518 NF | 527  |
| spy  | 518 NF | 386  |
| fliO | 518 NF | 750  |
| dcuC | 518 NF | 260  |
| tsx  | 518 NF | 1251 |
| torC | 518 NF | 854  |
| rplV | 518 NF | 238  |
| dcuB | 518 NF | 162  |
| mzrA | 518 NF | NF   |
| phoR | 518 NF | 1580 |
| rpsS | 518 NF | 375  |
| hybO | 518 NF | 345  |
| fliP | 518 NF | 946  |
| yafE | 518 NF | 326  |
| galM | 538 NF | 876  |
| mdtC | 538 NF | 883  |
| nikB | 538 NF | 700  |
| ahpC | 538 NF | 902  |
| aroM | 538 NF | 1279 |
| mntH | 538 NF | 1528 |
| exbD | 538 NF | 487  |
| ftsI | 538 NF | 147  |
| rseB | 538 NF | 883  |
| sbmC | 538 NF | 1107 |
| srlD | 538 NF | 1318 |
| ykfB | 538 NF | 722  |
| yccA | 538 NF | 1194 |
| xseA | 538 NF | 578  |
| mfd  | 538 NF | 1015 |
| tktB | 538 NF | 269  |
| pspE | 538 NF | 1019 |
| dadX | 538 NF | 480  |
| dgsA | 538 NF | 666  |
| fumC | 538 NF | 463  |
| ulaG | 538 NF | 876  |
| yjcH | 538 NF | 764  |
| atpE | 538 NF | 550  |
| smtA | 538 NF | 1946 |
| narV | 538 NF | 428  |
| yafX | 538 NF | 838  |

|      |        |        |      |
|------|--------|--------|------|
| nuoI | 538 NF |        | 503  |
| ilvB | 538 NF |        | 320  |
| kdpE | 538 NF |        | 1929 |
| nhaA | 538 NF |        | 1748 |
| oppB | 538 NF |        | 269  |
| rne  | 538 NF |        | 196  |
| rbsK | 538 NF |        | 444  |
| hisl | 538 NF |        | 1152 |
| fic  | 538 NF |        | 1208 |
| nikR | 538 NF |        | 898  |
| gdhA | 538 NF |        | 1125 |
| napH | 538 NF |        | 956  |
| cpxP | 538 NF |        | 902  |
| csiD | 538 NF |        | 296  |
| prs  | 538 NF |        | 221  |
| inaA | 538 NF |        | 808  |
| napC | 545 NF |        | 535  |
| sgbU | 545 NF |        | 982  |
| ycjX | 545 NF |        | 475  |
| csgG | 545 NF |        | 1761 |
| nfo  | 545 NF |        | 1314 |
| yigA | 545 NF |        | 1203 |
| fadB | 550 NF |        | 709  |
| rpmE | 550 NF |        | 598  |
| proP | 550 NF |        | 1276 |
| baeR | 550 NF |        | 1405 |
| clpX | 550 NF |        | 1592 |
| gcvH | 556 NF |        | 1019 |
| trpA | 556    | 124    | 52   |
| pgaA | 556 NF |        | 1771 |
| fliK | 556 NF |        | 361  |
| ivbL | 556 NF |        | 1093 |
| cysK | 556 NF |        | 357  |
| ydhY | 567 NF |        | 692  |
| astB | 567 NF |        | 1032 |
| fliJ | 567 NF |        | 409  |
| bfd  | 567 NF |        | 438  |
| nuoJ | 567 NF |        | 931  |
| dsbA | 567 NF |        | 700  |
| rbsC | 567 NF |        | 379  |
| napF | 567 NF |        | 592  |
| nrdG | 567 NF |        | 516  |
| ppdD | 567 NF |        | 1421 |
| ycaC | 567 NF |        | 564  |
| rlmI | 594    | 122 NF |      |
| lldR | 594 NF |        | 850  |
| fdnG | 594 NF |        | 784  |
| lacY | 594 NF |        | 656  |
| cysA | 594 NF |        | 831  |
| rob  | 594 NF |        | 572  |

|      |        |     |      |
|------|--------|-----|------|
| feoA | 594 NF |     | 125  |
| hypB | 594 NF |     | 221  |
| nanT | 594 NF |     | 1251 |
| uvrB | 594 NF |     | 475  |
| murG | 594 NF |     | 715  |
| rplT | 594 NF |     | 1341 |
| nsrR | 594    | 122 | 1331 |
| secG | 594 NF |     | 444  |
| hflX | 594 NF |     | 352  |
| fliE | 594 NF |     | 379  |
| nrdR | 594 NF |     | 1839 |
| ybjC | 594 NF |     | 1050 |
| flhE | 594 NF |     | 814  |
| nagE | 594 NF |     | 621  |
| cspC | 594 NF |     | 229  |
| iraP | 594 NF |     | 1084 |
| yhjA | 594 NF |     | 621  |
| uspA | 594 NF |     | 254  |
| rluC | 594 NF |     | 792  |
| nfuA | 601 NF | NF  |      |
| gutM | 601 NF |     | 1189 |
| motB | 601 NF |     | 162  |
| artP | 610 NF |     | 750  |
| metB | 610 NF |     | 2695 |
| pntA | 610 NF |     | 1276 |
| paal | 610 NF |     | 626  |
| cheR | 610 NF |     | 357  |
| ackA | 610 NF |     | 433  |
| rlmN | 610    | 100 | 546  |
| fecA | 610 NF |     | 590  |
| metJ | 610 NF |     | 1478 |
| proS | 610 NF |     | 709  |
| yeiL | 610 NF |     | 1453 |
| artQ | 610 NF |     | 1152 |
| yjhl | 610 NF |     | 492  |
| malY | 610 NF |     | 2498 |
| rplE | 610 NF |     | 451  |
| mhpA | 621 NF |     | 917  |
| yaJ  | 621 NF |     | 1650 |
| insD | 621 NF |     | 386  |
| paaH | 621 NF |     | 572  |
| msrB | 621 NF |     | 572  |
| uspE | 621 NF |     | 841  |
| glgB | 621 NF |     | 940  |
| yaiA | 621 NF |     | 1327 |
| ybgA | 621 NF |     | 792  |
| hyfF | 621 NF |     | 1225 |
| fldB | 621 NF |     | 1007 |
| folE | 632 NF |     | 433  |
| pykF | 632 NF |     | 692  |

|      |        |    |      |
|------|--------|----|------|
| gspB | 632 NF |    | 2031 |
| pncB | 632 NF |    | 480  |
| cusS | 632 NF |    | 2557 |
| groL | 632    | 67 | 307  |
| ascF | 632 NF |    | 1894 |
| yjbE | 632 NF |    | 1078 |
| ilvL | 632 NF |    | 883  |
| gntX | 632 NF |    | 1132 |
| cysN | 632 NF |    | 598  |
| frsA | 639 NF |    | 808  |
| metL | 639 NF |    | 1768 |
| bolA | 639 NF |    | 992  |
| lysU | 639    | 83 | 238  |
| fliR | 639 NF |    | 2031 |
| dnaJ | 639    | 83 | 1839 |
| yjaB | 639 NF |    | 1059 |
| fucP | 649 NF |    | 398  |
| lsrR | 649 NF |    | 1141 |
| malk | 649 NF |    | 345  |
| glmU | 649 NF |    | 492  |
| fixB | 649 NF |    | 2290 |
| recF | 649 NF |    | 722  |
| tpx  | 649 NF |    | 808  |
| accB | 649 NF |    | 451  |
| flgJ | 649 NF |    | 1754 |
| sufC | 661 NF |    | 352  |
| mdoH | 661 NF |    | 506  |
| hypD | 661 NF |    | 398  |
| ynfG | 661 NF |    | 204  |
| hisF | 661 NF |    | 1408 |
| yafU | 661 NF |    | 368  |
| ulaC | 661 NF |    | 1155 |
| yjhH | 661 NF |    | 1107 |
| exuR | 661 NF |    | 738  |
| rplW | 661 NF |    | 910  |
| sodC | 661 NF |    | 1544 |
| malX | 661 NF |    | 1027 |
| deoB | 680 NF |    | 1510 |
| xylH | 680 NF |    | 1416 |
| ygeV | 680 NF |    | 457  |
| ydeN | 680 NF |    | 463  |
| fliM | 680 NF |    | 313  |
| alsB | 680 NF |    | 1271 |
| ptsG | 680 NF |    | 1064 |
| rlmL | 680 NF |    | 917  |
| gntK | 680 NF |    | 1292 |
| ynfK | 680 NF |    | 976  |
| nrfA | 680 NF |    | 213  |
| pcnB | 680 NF |    | 1147 |
| paal | 680 NF |    | 1007 |

|      |        |      |
|------|--------|------|
| hofN | 680 NF | 1059 |
| napG | 680 NF | 1392 |
| murP | 680 NF | 1225 |
| fliN | 680 NF | 386  |
| betB | 680 NF | 800  |
| apt  | 680 NF | 1383 |
| iscS | 699 NF | 196  |
| acnA | 699 NF | 1074 |
| lsrF | 699 NF | 1371 |
| fliH | 699 NF | 409  |
| nuoL | 699 NF | 931  |
| gltA | 699 NF | 480  |
| ynfH | 699 NF | 221  |
| argF | 699 NF | 666  |
| cpdB | 699 NF | 850  |
| lysP | 699 NF | 754  |
| ldcC | 699 NF | 779  |
| cbpM | 699 NF | 1597 |
| ybgl | 699 NF | 273  |
| cheZ | 699 NF | 137  |
| garK | 699 NF | 854  |
| valS | 699 NF | 683  |
| napA | 699 NF | 1099 |
| mqsA | 699 NF | NF   |
| cysG | 735 NF | 1725 |
| ccmE | 735 NF | 1720 |
| flgK | 735 NF | 1045 |
| sgbE | 735 NF | 722  |
| yebC | 735 NF | 294  |
| nudB | 735 NF | 304  |
| argS | 735 NF | 828  |
| tsf  | 735 NF | 1432 |
| glgX | 735 NF | 527  |
| pdxA | 735 NF | 988  |
| fdx  | 735 NF | 1109 |
| yhfA | 735 NF | 1697 |
| alkB | 735 NF | 1790 |
| galK | 735 NF | 1371 |
| napB | 735 NF | 953  |
| emrD | 735 NF | 1197 |
| atpG | 735 NF | 792  |
| ylaB | 735 NF | 1300 |
| iclR | 735 NF | 2248 |
| thrA | 735 NF | 814  |
| yehF | 735 NF | 773  |
| fepB | 735 NF | 1474 |
| ytfK | 735 NF | 1039 |
| iscU | 735 NF | 352  |
| treA | 735 NF | 683  |
| fhuE | 735 NF | 1662 |

|      |        |    |      |
|------|--------|----|------|
| hepA | 735 NF |    | 1007 |
| lacZ | 735 NF |    | 2011 |
| pstS | 735 NF |    | 1132 |
| yciM | 735 NF |    | 1197 |
| yciH | 735 NF |    | 745  |
| fecB | 735 NF |    | 527  |
| fadI | 735 NF |    | 831  |
| fucU | 735 NF |    | 953  |
| aroL | 735 NF |    | 487  |
| lptD | 749 NF | NF |      |
| paaZ | 749 NF | NF |      |
| tomB | 749 NF | NF |      |
| glpT | 749 NF |    | 988  |
| grxD | 749 NF |    | 800  |
| codA | 749 NF |    | 535  |
| waaY | 749 NF | NF |      |
| hycC | 749    | 83 | 65   |
| ansP | 749 NF |    | 924  |
| hybD | 749 NF |    | 615  |
| waaK | 749 NF | NF |      |
| rpsJ | 749 NF |    | 213  |
| hlpA | 749 NF | NF |      |
| waaP | 749 NF | NF |      |
| pmbA | 757 NF |    | 1306 |
| hypF | 757 NF |    | 1225 |
| topA | 757 NF |    | 1032 |
| hyfH | 757 NF |    | 971  |
| yeiB | 757 NF |    | 1937 |
| eptB | 757 NF |    | 982  |
| exbB | 757 NF |    | 1203 |
| pfkA | 757 NF |    | 590  |
| cusF | 757 NF |    | 1208 |
| argR | 757 NF |    | 1942 |
| fmt  | 757 NF |    | 946  |
| motA | 757 NF |    | 85   |
| nusB | 757 NF |    | 398  |
| cutA | 757 NF |    | 876  |
| gapA | 757 NF |    | 438  |
| gmr  | 757 NF |    | 2591 |
| ydhC | 757 NF |    | 391  |
| yafL | 757 NF |    | 1267 |
| wrbA | 757    | 56 | 75   |
| ydhO | 793 NF |    | 729  |
| dsbB | 793 NF |    | 1300 |
| nuoH | 793 NF |    | 559  |
| bssS | 793 NF |    | 814  |
| can  | 793 NF |    | 621  |
| ade  | 793 NF |    | 1217 |
| gltB | 793 NF |    | 1405 |
| sohB | 793 NF |    | 1608 |



|      |         |      |
|------|---------|------|
| fadA | 793 NF  | 733  |
| clpB | 793 NF  | 1263 |
| nrdB | 793 NF  | 1379 |
| ravA | 793 100 | 1225 |
| mutS | 793 NF  | 610  |
| tdh  | 793 NF  | 843  |
| ppiD | 793 NF  | 686  |
| fadL | 793 NF  | 1125 |
| fadR | 793 NF  | 2354 |
| nanC | 793 NF  | 2373 |
| cysB | 793 NF  | 1251 |
| hsIV | 793 NF  | 213  |
| cytR | 793 NF  | 2586 |
| htpG | 793 NF  | 510  |
| ogt  | 793 NF  | 1949 |
| idnT | 793 NF  | 2024 |
| flhA | 793 NF  | 379  |
| evgS | 793 NF  | 1302 |
| yrdA | 793 NF  | 891  |
| hha  | 793 NF  | 917  |
| chpB | 793 NF  | 779  |
| rpsI | 793 NF  | 527  |
| araF | 793 NF  | 1464 |
| dsbG | 793 NF  | 872  |
| cysC | 793 NF  | 1147 |
| rpsU | 793 NF  | 281  |
| entD | 793 NF  | 2284 |
| mngR | 820 NF  | 604  |
| ulaD | 820 NF  | 1440 |
| rcsD | 820 NF  | 1700 |
| hflC | 820 NF  | 1846 |
| fepA | 820 NF  | 296  |
| sfsA | 820 NF  | 1351 |
| ftnB | 820 NF  | 976  |
| tyrS | 820 NF  | 773  |
| mtlA | 820 NF  | 1537 |
| mprA | 820 NF  | 1501 |
| amiA | 820 NF  | 773  |
| ybjN | 820 NF  | 651  |
| nikE | 820 NF  | 650  |
| fucK | 820 NF  | 1241 |
| rbsA | 820 NF  | 326  |
| lacl | 820 NF  | 535  |
| yafP | 820 NF  | 1735 |
| ugpB | 820 NF  | 1341 |
| entA | 820 NF  | 673  |
| hemH | 820 NF  | 1763 |
| ibpA | 820 NF  | 876  |
| luxS | 820 NF  | 1346 |
| ccmH | 820 NF  | 1777 |

|      |        |     |      |
|------|--------|-----|------|
| galP | 820 NF |     | 917  |
| yejE | 820 NF |     | 1695 |
| yhbJ | 820 NF |     | 1348 |
| viaO | 855 NF |     | 1916 |
| prpR | 855 NF |     | 1107 |
| csiE | 855 NF |     | 850  |
| ygiB | 855 NF |     | 1750 |
| modA | 855 NF |     | 2009 |
| yjdM | 855 NF |     | 1646 |
| ftsZ | 855 NF |     | 2040 |
| napD | 855 NF |     | 621  |
| moaD | 855 NF |     | 451  |
| fimE | 855 NF |     | 592  |
| mhpB | 855 NF |     | 1093 |
| nagB | 855 NF |     | 1295 |
| glgS | 855 NF |     | 891  |
| mgIC | 855 NF |     | 738  |
| ompC | 855    | 110 | 2445 |
| argG | 855 NF |     | 1610 |
| purD | 855 NF |     | 1910 |
| srlB | 855 NF |     | 1064 |
| dinJ | 855 NF |     | 368  |
| paaK | 855 NF |     | 1147 |
| dmsC | 855 NF |     | 375  |
| blc  | 855 NF |     | 1012 |
| gspG | 855 NF |     | 1271 |
| yahD | 855 NF |     | 391  |
| purH | 855 NF |     | 630  |
| ccmC | 855 NF |     | 2101 |
| uvrD | 855 NF |     | 1444 |
| dsbC | 855 NF |     | 1327 |
| gcl  | 855 NF |     | 709  |
| modE | 855 NF |     | 1444 |
| fixA | 855 NF |     | 1159 |
| atpC | 855 NF |     | 428  |
| hybC | 855 NF |     | 546  |
| yigB | 855 NF |     | 931  |
| rpoE | 903 NF | NF  |      |
| ccmD | 903 NF |     | 117  |
| dppD | 903 NF |     | 1709 |
| nrdA | 903 NF |     | 598  |
| sixA | 903 NF |     | 1194 |
| dxs  | 903 NF |     | 1582 |
| modC | 903 NF |     | 1866 |
| yraN | 903 NF |     | 1208 |
| hyaA | 903 NF |     | 2263 |
| sufS | 903 NF |     | 1544 |
| thrC | 903 NF |     | 1039 |
| fliF | 903 NF |     | 418  |
| mnmG | 903 NF |     | 1341 |

|      |        |      |
|------|--------|------|
| yehW | 903 NF | 1967 |
| aidB | 903 NF | 1002 |
| yehA | 903 NF | 683  |
| gltX | 903 NF | 516  |
| cstA | 903 NF | 535  |
| dhaL | 903 NF | 1180 |
| ispA | 903 NF | 1263 |
| fliG | 903 NF | 503  |
| yqeF | 903 NF | 946  |
| ulaE | 903 NF | 1532 |
| accC | 903 NF | 418  |
| cspl | 903 NF | NF   |
| aroA | 903 NF | 598  |
| hisH | 903 NF | 703  |
| yagN | 903 NF | 1563 |
| ymfE | 903 NF | 506  |
| pgaB | 903 NF | 1919 |
| ribF | 903 NF | 1002 |
| glcE | 903 NF | 368  |
| typA | 903 NF | 800  |
| rraB | 903 NF | 683  |
| cysI | 903 NF | 1002 |
| argT | 903 NF | 1180 |
| yidQ | 903 NF | 917  |
| gltD | 903 NF | 1528 |
| cdaR | 903 NF | 254  |
| glpR | 903 NF | 1400 |
| icd  | 903 NF | 1024 |
| purR | 903 NF | 352  |
| ulaA | 903 NF | 1279 |
| pqiB | 903 NF | 1755 |
| ppiA | 903 NF | 1555 |
| mazG | 903 NF | 1740 |
| rseP | 903 NF | 444  |
| narQ | 903 NF | 2636 |
| fecl | 974 NF | 872  |
| fimB | 974 NF | 2667 |
| yajO | 974 NF | 1665 |
| cysM | 974 NF | 1027 |
| waaA | 974 NF | 745  |
| gcd  | 974 NF | 1517 |
| uxaA | 974 NF | 1132 |
| pqiA | 974 NF | 1450 |
| rsd  | 974 NF | 1470 |
| yegR | 974 NF | 779  |
| amyA | 974 NF | 1053 |
| yhcN | 974 NF | 1155 |
| fes  | 974 NF | 1597 |
| ppc  | 974 NF | 902  |
| csgB | 974 NF | 1412 |

|      |        |      |
|------|--------|------|
| mhpE | 974 NF | 1592 |
| wzzE | 974 NF | 943  |
| csgF | 974 NF | 2232 |
| dppB | 974 NF | 1587 |
| aroP | 974 NF | 438  |
| pheS | 974 NF | 320  |
| rpsK | 974 NF | 1440 |
| hscA | 974 NF | 2014 |
| ftsB | 974 NF | 519  |
| astE | 974 NF | 1875 |
| caiA | 974 NF | 1344 |
| holE | 974 NF | 661  |
| betT | 974 NF | 1071 |
| tppB | 974 NF | 1228 |
| ileS | 974 NF | 626  |
| yjeE | 974 NF | 1707 |
| yrfG | 974 NF | 2031 |
| xylA | 974 NF | 1059 |
| tadA | 974 NF | 1418 |
| fimF | 974 NF | 982  |
| agp  | 974 NF | 768  |
| cspG | 974 NF | NF   |
| yqhD | 974 NF | 779  |
| cvpA | 974 NF | 535  |
| ddlB | 974 NF | 1522 |
| atpD | 974 NF | 326  |
| ssuC | 974 NF | 1859 |
| dkgB | 974 NF | 1889 |
| fruB | 974 NF | 1012 |
| cbl  | 974 NF | 971  |
| pheT | 974 NF | 162  |
| sbmA | 974 NF | 754  |
| ldhA | 974 NF | 1125 |
| gutQ | 974 NF | 1885 |
| gnd  | 974 NF | 863  |
| entF | 974 NF | 1631 |
| nlpD | 974 NF | 1271 |
| atoA | 974 NF | 2253 |
| ampC | 974 NF | 998  |
| ssnA | 974 NF | 1662 |
| fecR | 974 NF | 2510 |
| appC | 974 NF | 2162 |
| nrfD | 974 NF | 898  |
| nagA | 974 NF | 1646 |
| yfiF | 974 NF | 2043 |
| yahE | 974 NF | 1125 |
| yobF | 974 NF | 503  |
| truB | 974 NF | 683  |
| osmF | 974 NF | 1952 |
| yebE | 974 NF | 2180 |

|      |         |     |      |
|------|---------|-----|------|
| yhjC | 974 NF  |     | 1787 |
| ytfQ | 974 NF  |     | 147  |
| purN | 974 NF  |     | 683  |
| ydhJ | 974 NF  |     | 457  |
| npr  | 974 NF  |     | 1147 |
| xdhC | 1020 NF |     | 1510 |
| glgC | 1020 NF |     | 535  |
| dut  | 1020 NF |     | 1203 |
| rfaD | 1020    | 56  | 1251 |
| recA | 1020 NF |     | 1134 |
| hpt  | 1020 NF |     | 1383 |
| sufE | 1020 NF |     | 1556 |
| ugpC | 1020 NF |     | 1901 |
| glnQ | 1020 NF |     | 821  |
| rph  | 1020 NF |     | 492  |
| ykgM | 1020 NF |     | 1287 |
| mdh  | 1020 NF |     | 1541 |
| dinF | 1020 NF |     | 1604 |
| ibpB | 1020 NF |     | 1482 |
| mioC | 1020 NF |     | 578  |
| yihG | 1020 NF |     | 1697 |
| ybbN | 1020 NF |     | 510  |
| yafO | 1020 NF |     | 2039 |
| yhjJ | 1020 NF |     | 1318 |
| rpsQ | 1020 NF |     | 858  |
| adiY | 1020 NF |     | 238  |
| ulaF | 1020 NF |     | 1894 |
| iscX | 1020 NF |     | 1486 |
| phr  | 1020 NF |     | 1774 |
| rpmC | 1020 NF |     | 745  |
| fliQ | 1020 NF |     | 361  |
| gntU | 1020 NF |     | 1405 |
| fadJ | 1020 NF |     | 1314 |
| yejF | 1020 NF |     | 2105 |
| mqsR | 1020 NF |     | 1497 |
| fucl | 1020 NF |     | 1088 |
| mreC | 1020    | 129 | 58   |
| yceI | 1020 NF |     | 1464 |
| yfdX | 1020 NF |     | 1875 |
| Int  | 1020 NF |     | 1489 |
| nrdH | 1020 NF |     | 1279 |
| lspA | 1020 NF |     | 1548 |
| rnc  | 1020 NF |     | 948  |
| ulaR | 1020 NF |     | 2014 |
| betA | 1020 NF |     | 1107 |
| bglX | 1020 NF |     | 1988 |
| alsE | 1020 NF |     | 1896 |
| rplX | 1020 NF |     | 891  |
| bamB | 1020 NF |     | 686  |
| yegE | 1020 NF |     | 1084 |

|      |         |      |
|------|---------|------|
| atoE | 1020 NF | 626  |
| betI | 1030 NF | 838  |
| deoA | 1030 NF | 1045 |
| ccmF | 1030 NF | 1450 |
| greA | 1030 NF | 792  |
| puuA | 1030 NF | 527  |
| rplP | 1030 NF | 320  |
| gph  | 1030 NF | 1435 |
| ydeA | 1030 NF | 1517 |
| rpmA | 1030 NF | 1088 |
| yciW | 1040 NF | 559  |
| fbaA | 1040 NF | 2514 |
| argD | 1040 NF | 1906 |
| guaA | 1040 NF | 883  |
| yjiJ | 1040 NF | 1489 |
| rhaA | 1040 NF | 1709 |
| ftsW | 1040 NF | 1642 |
| livF | 1040 NF | 733  |
| atoB | 1040 NF | 2384 |
| ydbD | 1040 NF | 2090 |
| gcvA | 1053 NF | 2441 |
| ves  | 1053 NF | 1232 |
| csrD | 1053 NF | 825  |
| ydeJ | 1053 NF | 1796 |
| purM | 1053 NF | 1395 |
| mhpD | 1053 NF | 1967 |
| ydfZ | 1053 NF | 281  |
| ilvC | 1053 NF | 213  |
| uxaB | 1053 NF | 729  |
| lsrB | 1053 NF | 1668 |
| ttcA | 1053 NF | 1655 |
| fliY | 1053 NF | 931  |
| sdaA | 1053 NF | 1416 |
| pstC | 1067 NF | 1925 |
| xseB | 1067 NF | 2129 |
| asnA | 1067 NF | 1071 |
| rpiB | 1067 NF | 1377 |
| glnK | 1067 NF | 2672 |
| frc  | 1067 NF | 1967 |
| thrB | 1067 NF | 1392 |
| oppF | 1067 NF | 988  |
| rpsM | 1067 NF | 1563 |
| oppC | 1067 NF | 800  |
| rseC | 1067 NF | 1251 |
| ybeX | 1067 NF | 1724 |
| phoA | 1067 NF | 920  |
| purL | 1067 NF | 1390 |
| lpxA | 1077 NF | 666  |
| glk  | 1077 NF | 792  |
| livM | 1077 NF | 1118 |

|      |         |      |
|------|---------|------|
| malQ | 1077 NF | 1771 |
| zwf  | 1077 NF | 578  |
| potH | 1077 NF | 1982 |
| artM | 1077 NF | 1790 |
| mlrA | 1077 NF | 1722 |
| glyS | 1077 NF | 304  |
| ygiC | 1077 NF | 1969 |
| yggW | 1086 NF | 2196 |
| relE | 1086 NF | 1903 |
| arsC | 1086 NF | 1548 |
| nfsA | 1086 NF | 1059 |
| rluA | 1086 NF | 1624 |
| cysW | 1086 NF | 709  |
| galE | 1086 NF | 1880 |
| yhdN | 1086 NF | 1576 |
| hflK | 1093 NF | 1819 |
| rnIA | 1093 NF | 1184 |
| ftsK | 1093 NF | 1166 |
| gltL | 1093 NF | 2064 |
| asr  | 1093 NF | 2009 |
| mall | 1093 NF | 2660 |
| nupC | 1093 NF | 1173 |
| rhaB | 1108 NF | 1863 |
| rpmJ | 1108 NF | 917  |
| yccJ | 1108 NF | 463  |
| ymgA | 1108 NF | 1327 |
| pntB | 1108 NF | 1910 |
| paaY | 1108 NF | 1241 |
| lldP | 1108 NF | 438  |
| corA | 1108 NF | 111  |
| cusR | 1108 NF | 2338 |
| relB | 1108 NF | 1186 |
| narW | 1108 NF | 2224 |
| lysA | 1108 NF | 754  |
| glpE | 1108 NF | 1152 |
| glpF | 1108 NF | 610  |
| ycfS | 1108 NF | 1631 |
| purA | 1121 NF | 1730 |
| nanK | 1121 NF | 1354 |
| cmk  | 1121 NF | 808  |
| fhuA | 1121 NF | 821  |
| ubiX | 1121 NF | 1540 |
| argO | 1121 NF | 2100 |
| ugpQ | 1121 NF | 1501 |
| mreD | 1121 NF | 1633 |
| iscA | 1121 NF | 630  |
| gyrB | 1121 NF | 204  |
| aroG | 1121 NF | 891  |
| trxC | 1121 NF | 2377 |
| sgbH | 1121 NF | 784  |

|      |         |       |
|------|---------|-------|
| dcuS | 1132 NF | 2186  |
| fruA | 1132 NF | 1982  |
| creC | 1132 NF | 1597  |
| feoB | 1132 NF | 898   |
| ccmA | 1132 NF | 1537  |
| allR | 1132 NF | 779   |
| yhch | 1132 NF | 821   |
| speF | 1132 NF | 2583  |
| argH | 1132 NF | 1513  |
| rpsT | 1132 NF | 703   |
| dam  | 1155 NF | 1444  |
| panF | 1155 NF | 1493  |
| gcvP | 1155 NF | 409   |
| hisS | 1155 NF | 2197  |
| fadE | 1155 NF | 568   |
| hspQ | 1155 NF | 2258  |
| nikC | 1155 NF | 1474  |
| pspG | 1155 NF | 1901  |
| yafW | 1155 NF | 1993  |
| mtlD | 1155 NF | 1559  |
| hycG | 1155 NF | 1750  |
| mtfA | 1155 NF | 976   |
| ydfG | 1155 NF | 1059  |
| yfjI | 1155 NF | 1672  |
| ascG | 1155 NF | 1800  |
| uspF | 1155 NF | 546   |
| rssB | 1155 NF | 2166  |
| hslO | 1155 NF | 1604  |
| fepD | 1155 NF | 2258  |
| malF | 1155 NF | 516   |
| trmD | 1155 NF | 1132  |
| viaF | 1155 NF | 1780  |
| pgpA | 1173 NF | 1740  |
| agaB | 1173 NF | 2083  |
| nikA | 1173    | 56 47 |
| citE | 1173 NF | 645   |
| dpiA | 1173 NF | 2579  |
| ribD | 1173 NF | 1517  |
| dapD | 1173 NF | 841   |
| era  | 1173 NF | 808   |
| murF | 1173 NF | 1783  |
| fxsA | 1173 NF | 1580  |
| yibD | 1173 NF | 1099  |
| rihB | 1173 NF | 1982  |
| ycgZ | 1173 NF | 550   |
| metQ | 1173 NF | 2148  |
| ccmB | 1173 NF | 1931  |
| rfe  | 1173 NF | 2076  |
| glxR | 1173 NF | 1456  |
| pspA | 1173 NF | 1977  |



|      |         |         |
|------|---------|---------|
| pepD | 1182 NF | 1853    |
| glcA | 1182 NF | 1495    |
| insK | 1182 NF | 2073    |
| fkpB | 1182 NF | 1887    |
| dacC | 1182 NF | 1440    |
| yqcE | 1182 NF | 1568    |
| trmH | 1182 NF | 1456    |
| phnH | 1182 NF | 1186    |
| hybG | 1182 NF | 1819    |
| hslU | 1193    | 119 650 |
| rnd  | 1193 NF | 1759    |
| serA | 1193 NF | 1147    |
| caiT | 1193 NF | 2039    |
| ttdT | 1193 NF | 722     |
| gspJ | 1193 NF | 2031    |
| efp  | 1193 NF | 817     |
| melA | 1193 NF | 1684    |
| lptA | 1193 NF | 1486    |
| ilvI | 1193 NF | 700     |
| folA | 1193 NF | 1138    |
| ycgB | 1220 NF | 647     |
| rplU | 1220 NF | 1045    |
| entS | 1220 NF | 2411    |
| menB | 1220 NF | 872     |
| modB | 1220 NF | 2352    |
| yoaD | 1220 NF | 1795    |
| rraA | 1220 NF | 2020    |
| umuD | 1220 NF | 2078    |
| argP | 1220 NF | 1862    |
| ydeP | 1220 NF | 2192    |
| glpQ | 1220 NF | 1358    |
| rhtC | 1220 NF | 590     |
| fepC | 1220 NF | 2315    |
| yoaE | 1220 NF | 1740    |
| dapB | 1220 NF | 1194    |
| ptsI | 1220 NF | 2376    |
| znuB | 1220 NF | 2369    |
| appA | 1220 NF | 2300    |
| glgP | 1220 NF | 992     |
| glnS | 1220 NF | 1459    |
| ilvY | 1220 NF | 1205    |
| purK | 1220 NF | 1777    |
| yjjU | 1220 NF | 336     |
| araC | 1220 NF | 1695    |
| purF | 1220 NF | 898     |
| hslJ | 1220 NF | 506     |
| mhpC | 1220 NF | 1867    |
| prmC | 1246 NF | 2224    |
| kbaZ | 1246 NF | 630     |
| alsA | 1246 NF | 1528    |

|      |         |    |      |
|------|---------|----|------|
| asnC | 1246 NF |    | 2546 |
| lsrG | 1246 NF |    | 1915 |
| der  | 1246 NF |    | 1574 |
| metK | 1246 NF |    | 1107 |
| dcuD | 1246 NF |    | 1675 |
| speA | 1246 NF |    | 590  |
| treF | 1246 NF |    | 1501 |
| gcvT | 1246 NF |    | 1132 |
| hofO | 1246 NF |    | 2476 |
| bamA | 1246 NF |    | 1429 |
| ybiV | 1246 NF |    | 992  |
| prlC | 1246 NF |    | 2425 |
| glyQ | 1246 NF |    | 1173 |
| bcp  | 1246 NF |    | 602  |
| uidC | 1246 NF |    | 1659 |
| yeaD | 1246 NF |    | 1464 |
| ybiS | 1246 NF |    | 1067 |
| ugpE | 1246 NF |    | 2224 |
| thrS | 1246 NF |    | 764  |
| nrdE | 1246 NF |    | 2484 |
| fabZ | 1246 NF |    | 1374 |
| infC | 1246 NF |    | 1432 |
| viaA | 1246 NF |    | 1578 |
| gcvR | 1260 NF |    | 1718 |
| yjeF | 1260 NF |    | 1862 |
| dnaN | 1260    | 56 | 1684 |
| gspD | 1260 NF |    | 2003 |
| htpX | 1260 NF |    | 1787 |
| yecR | 1260 NF |    | 428  |
| gspO | 1260 NF |    | 1241 |
| ydhU | 1260 NF |    | 1134 |
| setA | 1260 NF |    | 1904 |
| glnP | 1260 NF |    | 1537 |
| hemF | 1260 NF |    | 2335 |
| cobT | 1260 NF |    | 2328 |
| clpA | 1260 NF |    | 1251 |
| aslB | 1260 NF |    | 1568 |
| atpI | 1282 NF |    | 428  |
| glvC | 1282 NF |    | 1374 |
| agaA | 1282 NF |    | 1695 |
| alsC | 1282 NF |    | 2141 |
| narZ | 1282 NF |    | 2290 |
| fucR | 1282 NF |    | 814  |
| yajQ | 1282 NF |    | 1447 |
| atoC | 1282 NF |    | 1672 |
| idnR | 1282 NF |    | 2601 |
| wzxE | 1282 NF |    | 1447 |
| accA | 1282 NF |    | 1453 |
| ftsQ | 1282 NF |    | 2269 |
| sulA | 1282 NF |    | 1271 |

|      |         |      |
|------|---------|------|
| glpB | 1282 NF | 2098 |
| araB | 1282 NF | 1009 |
| tyrP | 1282 NF | 2348 |
| yncE | 1282 NF | 931  |
| yciC | 1282 NF | 1614 |
| uhpT | 1282 NF | 2000 |
| psd  | 1282 NF | 1422 |
| acrE | 1282 NF | 1626 |
| xdhA | 1282 NF | 1292 |
| purT | 1309 NF | 971  |
| hokD | 1309 NF | 1894 |
| chbC | 1309 NF | 1753 |
| glpD | 1309 NF | 2249 |
| ybfE | 1309 NF | 1712 |
| yaaJ | 1309 NF | 1099 |
| prpB | 1309 NF | 1244 |
| emrA | 1309 NF | 1735 |
| argC | 1309 NF | 966  |
| xapR | 1309 NF | 1648 |
| ariR | 1309 NF | 1704 |
| dksA | 1309 NF | 656  |
| mraZ | 1309 NF | 1898 |
| rpiR | 1309 NF | 1544 |
| tsr  | 1309 NF | 2114 |
| yejH | 1309 NF | 1973 |
| fepE | 1309 NF | 2367 |
| xapB | 1309 NF | 1924 |
| fecE | 1309 NF | 1228 |
| ybbY | 1309 NF | 1735 |
| yefM | 1309 NF | 2294 |
| yhhY | 1309 NF | 1991 |
| rpsL | 1309 NF | 147  |
| trxB | 1309 NF | 475  |
| damX | 1309 NF | 1614 |
| creA | 1309 NF | 2107 |
| ubiA | 1340 NF | 1718 |
| tyrA | 1340 NF | 1287 |
| nfsB | 1340 NF | 1180 |
| kbl  | 1340 NF | 1173 |
| tyrB | 1340 NF | 1869 |
| purE | 1340 NF | 2259 |
| moaE | 1340 NF | 475  |
| yejA | 1340 NF | 1470 |
| birA | 1340 NF | 1232 |
| nuoA | 1340 NF | 1287 |
| yffB | 1340 NF | 814  |
| yggE | 1340 NF | 1551 |
| hyfC | 1340 NF | 1931 |
| dinB | 1340 NF | 2229 |
| cynR | 1340 NF | 1790 |

|      |         |      |      |
|------|---------|------|------|
| rhaR | 1340 NF | 2371 |      |
| pepT | 1340 NF | 568  |      |
| dhaK | 1340 NF | 1574 |      |
| yfgD | 1340 NF | 953  |      |
| glpA | 1340 NF | 2304 |      |
| oppD | 1340 NF | 1259 |      |
| bamC | 1340 NF | 1795 |      |
| gspF | 1340 NF | 2309 |      |
| yadS | 1340 NF | 703  |      |
| seqA | 1340 NF | 1933 |      |
| ftsA | 1340 NF | 1568 |      |
| gmk  | 1340 NF | 1650 |      |
| flgl | 1340 NF | 1495 |      |
| speB | 1340 NF | 1825 |      |
| dhaR | 1340 NF | 1405 |      |
| livJ | 1340 NF | 2093 |      |
| glgA | 1373 NF | 1829 |      |
| yceJ | 1373 NF | 1700 |      |
| yfeC | 1373 NF | 1517 |      |
| pheP | 1373 NF | 2154 |      |
| yafQ | 1373 NF | 1440 |      |
| fhuB | 1373 NF | 2358 |      |
| rpsH | 1373 NF | 137  |      |
| ysgA | 1373 NF | 1768 |      |
| aroB | 1373 NF | 2060 |      |
| leuB | 1373 NF | 1761 |      |
| btuF | 1373 NF | 2193 |      |
| yeaR | 1373 NF | 1946 |      |
| rffH | 1373 NF | 1631 |      |
| chbA | 1373 NF | 988  |      |
| livG | 1373 NF | 1497 |      |
| yecF | 1373 NF | 2142 |      |
| btuB | 1373 NF | 1859 |      |
| malP | 1373 NF | 825  |      |
| moaB | 1373 NF | 1093 |      |
| hofM | 1373 NF | 1689 |      |
| rnhB | 1373 NF | 1335 |      |
| menC | 1373 NF | 1024 |      |
| bglF | 1373 NF | 1548 |      |
| lsrD | 1373 NF | 2274 |      |
| yjcZ | 1373 NF | 480  |      |
| norR | 1373 NF | 2026 |      |
| rffC | 1373 NF | 2169 |      |
| pth  | 1373 NF | 1621 |      |
| uvrY | 1373 NF | 457  |      |
| sdiA | 1373 NF | 1064 |      |
| ygaC | 1373 NF | 1631 |      |
| erpA | 1373 NF | 1125 |      |
| gloA | 1373    | 56   | 1292 |
| nanE | 1410 NF | 1470 |      |

|      |         |      |
|------|---------|------|
| viaK | 1410 NF | 2291 |
| macB | 1410 NF | 1805 |
| cheB | 1410 NF | 487  |
| aroK | 1410 NF | 1125 |
| ruvA | 1410 NF | 1400 |
| mdtD | 1410 NF | 2125 |
| dapA | 1410 NF | 1819 |
| mngA | 1410 NF | 1638 |
| prfA | 1410 NF | 1971 |
| uxaC | 1410 NF | 1486 |
| dnaX | 1410 NF | 1729 |
| citC | 1410 NF | 1364 |
| rffE | 1410 NF | 2281 |
| murQ | 1410 NF | 2185 |
| nanA | 1410 NF | 1335 |
| ybeL | 1410 NF | 1002 |
| cydC | 1410 NF | 1390 |
| yhdX | 1410 NF | 645  |
| tpiA | 1410 NF | 357  |
| murR | 1410 NF | NF   |
| yihI | 1410 NF | 1050 |
| gntR | 1410 NF | 1803 |
| ilvA | 1410 NF | 2416 |
| pspB | 1410 NF | 1707 |
| rffD | 1410 NF | 1695 |
| yibA | 1410 NF | 2162 |
| tsgA | 1410 NF | 2014 |
| miaA | 1410 NF | 2331 |
| eno  | 1410 NF | 1358 |
| tfaQ | 1410 NF | 709  |
| infA | 1410 NF | 1474 |
| kdsB | 1410 NF | 1659 |
| moeA | 1410 NF | 2198 |
| bioA | 1410 NF | 2236 |
| yrbA | 1410 NF | 590  |
| hemA | 1410 NF | 2022 |
| ybaB | 1463 NF | 1964 |
| rpsG | 1463 NF | 463  |
| hisQ | 1463 NF | 1505 |
| lsrK | 1463 NF | 1889 |
| nei  | 1463 NF | 931  |
| nadC | 1463 NF | 2682 |
| yfbR | 1463 NF | 2515 |
| coaA | 1463 NF | 1964 |
| hycD | 1463 NF | 1969 |
| araJ | 1463 NF | 1807 |
| xdhB | 1463 NF | 2017 |
| fabB | 1463 NF | 2036 |
| purB | 1463 NF | 1364 |
| pitB | 1463 NF | 1470 |

|      |         |    |      |
|------|---------|----|------|
| nagD | 1463 NF |    | 2286 |
| nanM | 1463 NF |    | 2598 |
| yhbU | 1463 NF |    | 497  |
| holB | 1463 NF |    | 2205 |
| flhB | 1463 NF |    | 1050 |
| yfeX | 1463 NF |    | 615  |
| coaD | 1463 NF |    | 1400 |
| efeO | 1463 NF |    | 828  |
| dsdC | 1463 NF |    | 1795 |
| metN | 1463 NF |    | 1608 |
| wcaA | 1463 NF |    | 2426 |
| prmA | 1463 NF |    | 1608 |
| nadB | 1463 NF |    | 1964 |
| livH | 1463 NF |    | 578  |
| rimI | 1463 NF | NF |      |
| fdhF | 1463 NF |    | 1869 |
| cspE | 1463 NF |    | 1259 |
| rfaS | 1463 NF |    | 1924 |
| hipB | 1463 NF |    | 1481 |
| ispE | 1463 NF |    | 931  |
| ptsA | 1463 NF |    | 2270 |
| ddpX | 1463 NF |    | 2169 |
| prpD | 1463 NF |    | 2079 |
| uidR | 1463 NF |    | 2055 |
| ytfJ | 1463 NF |    | 1743 |
| recN | 1463 NF |    | 1852 |
| yciE | 1463 NF |    | 1067 |
| mutL | 1463 NF |    | 2297 |
| yiiS | 1463 NF |    | 1276 |
| polB | 1463 NF |    | 2312 |
| hscB | 1463 NF |    | 1386 |
| phnD | 1463 NF |    | 982  |
| leuC | 1463 NF |    | 1759 |
| ykgC | 1463 NF |    | 288  |
| ydiU | 1463 NF |    | 1371 |
| yeaY | 1463 NF |    | 1217 |
| yciS | 1463 NF |    | 1118 |
| bioD | 1463 NF |    | 1886 |
| yccM | 1463 NF |    | 1937 |
| yfgG | 1546 NF |    | 904  |
| glpG | 1546 NF |    | 1964 |
| panB | 1546 NF |    | 1677 |
| nrfG | 1546 NF |    | 2176 |
| bglG | 1546 NF |    | 2219 |
| gor  | 1546 NF |    | 1859 |
| clpP | 1546 NF |    | 838  |
| yjhP | 1546 NF | NF |      |
| rffM | 1546 NF |    | 1880 |
| fiu  | 1546 NF |    | 2155 |
| clcA | 1546 NF |    | 1672 |

|      |         |      |
|------|---------|------|
| ubiG | 1546 NF | 1592 |
| dnaE | 1546 NF | 1155 |
| znuA | 1546 NF | 2297 |
| mtlR | 1546 NF | 2589 |
| yejB | 1546 NF | 1642 |
| metH | 1546 NF | 1849 |
| puuD | 1546 NF | 1015 |
| serC | 1546 NF | 1712 |
| slyB | 1546 NF | 1267 |
| argA | 1546 NF | 2292 |
| intS | 1546 NF | 2175 |
| metE | 1546 NF | 1302 |
| dnaG | 1546 NF | 1655 |
| ydhQ | 1546 NF | 2084 |
| recR | 1546 NF | 1314 |
| galR | 1546 NF | 1677 |
| soxS | 1546 NF | 2468 |
| xthA | 1546 NF | 1241 |
| dppC | 1546 NF | 2381 |
| lipB | 1546 NF | 1390 |
| yjeK | 1546 NF | 1115 |
| gltF | 1546 NF | 2409 |
| yjbG | 1546 NF | 2306 |
| ispH | 1546 NF | 1232 |
| ilvM | 1546 NF | 2253 |
| fhuD | 1546 NF | 2237 |
| tbpA | 1546 NF | 2501 |
| yjeP | 1546 NF | 2098 |
| yqjH | 1546 NF | 2345 |
| spoT | 1546 NF | 1254 |
| bacA | 1546 NF | 2322 |
| glnB | 1546 NF | 661  |
| pagP | 1546 NF | 1476 |
| gpmM | 1546 NF | 170  |
| mukB | 1546 NF | 1320 |
| arsR | 1546 NF | 2117 |
| rdgB | 1546 NF | 1822 |
| ddpC | 1546 NF | 2083 |
| ydcS | 1546 NF | 673  |
| rfaL | 1546 NF | 2445 |
| fhuC | 1546 NF | 2100 |
| gntP | 1546 NF | 2154 |
| yhhX | 1546 NF | 1383 |
| gltK | 1546 NF | 1027 |
| hipA | 1546 NF | 2137 |
| rdoA | 1546 NF | 966  |
| hsdS | 1546 NF | 1563 |
| ebgC | 1546 NF | 2500 |
| uxuR | 1546 NF | 1537 |
| amtB | 1546 NF | 2212 |

|      |         |    |      |
|------|---------|----|------|
| argI | 1546 NF |    | 2053 |
| amn  | 1546 NF |    | 1364 |
| sgrR | 1546 NF |    | 1800 |
| ubiC | 1546 NF |    | 1599 |
| yqjI | 1546 NF |    | 2418 |
| rpe  | 1546 NF |    | 2007 |
| pstB | 1546 NF | NF |      |
| yhaV | 1546 NF |    | 1871 |
| rssA | 1546 NF |    | 959  |
| intQ | 1546 NF |    | 2488 |
| yhcC | 1546 NF |    | 2114 |
| atoD | 1546 NF |    | 1726 |
| trpS | 1546 NF |    | 808  |
| mukE | 1546 NF |    | 1959 |
| lsrA | 1546 NF |    | 2469 |
| ykfl | 1546 NF |    | 2150 |
| ycjF | 1546 NF |    | 1235 |
| tehB | 1546 NF |    | 1335 |
| ygdB | 1546 NF |    | 2493 |
| fadH | 1546 NF |    | 1646 |
| hpf  | 1546 NF |    | 1064 |
| acrA | 1546 NF |    | 1675 |
| dapE | 1779 NF |    | 2420 |
| marB | 1779 NF |    | 1949 |
| idnO | 1779 NF |    | 2091 |
| pabA | 1779 NF |    | 1655 |
| rsmA | 1779 NF | NF |      |
| lysR | 1779 NF |    | 2607 |
| rimP | 1779 NF | NF |      |
| ygiM | 1779 NF | NF |      |
| potF | 1779 NF |    | 2185 |
| entH | 1779 NF | NF |      |
| rnpA | 1779 NF |    | 1093 |
| lptC | 1779 NF | NF |      |
| ung  | 1779 NF |    | 1742 |
| ruvC | 1779 NF |    | 1532 |
| ydcH | 1779 NF |    | 1841 |
| fpr  | 1779 NF |    | 2404 |
| entE | 1779 NF |    | 1050 |
| ribA | 1779 NF |    | 519  |
| livK | 1779 NF |    | 2503 |
| yjhB | 1779 NF |    | 1712 |
| feaR | 1779 NF |    | 1880 |
| lpoA | 1779 NF | NF |      |
| apaG | 1779 NF |    | 2031 |
| mak  | 1779 NF |    | 1220 |
| pncC | 1779 NF | NF |      |
| ydaT | 1779 NF |    | 1898 |
| leuL | 1779 NF |    | 1829 |
| ptsH | 1779 NF |    | 1921 |



|      |         |    |      |
|------|---------|----|------|
| yecA | 1779 NF |    | 1563 |
| gspA | 1779 NF |    | 2178 |
| bdcA | 1779 NF | NF |      |
| waaQ | 1779 NF | NF |      |
| glj  | 1779 NF |    | 2208 |
| allA | 1779 NF |    | 2267 |
| trxA | 1779 NF |    | 1763 |
| pphA | 1779 NF |    | 1999 |
| yjcS | 1779 NF |    | 2453 |
| hcaT | 1779 NF |    | 1292 |
| slmA | 1779 NF |    | 2246 |
| basS | 1779 NF |    | 2236 |
| fruK | 1779 NF |    | 2076 |
| cyaA | 1779 NF |    | 2044 |
| rcnA | 1779 NF |    | 2322 |
| fkpA | 1779 NF |    | 1132 |
| eda  | 1779 NF |    | 1742 |
| idnK | 1779 NF |    | 2524 |
| hofQ | 1779 NF |    | 1764 |
| scpC | 1779 NF |    | 2037 |
| araG | 1779 NF |    | 1839 |
| yieE | 1779 NF |    | 808  |
| yhiL | 1779 NF |    | 2166 |
| alaC | 1779 NF | NF |      |
| rsxA | 1779 NF |    | 1241 |
| rho  | 1779 NF |    | 1141 |
| arsB | 1779 NF |    | 1166 |
| recX | 1779 NF |    | 2453 |
| cycA | 1779 NF |    | 1412 |
| zinT | 1779 NF | NF |      |
| cynS | 1779 NF |    | 2464 |
| tynA | 1779 NF |    | 2241 |
| phnJ | 1779 NF |    | 2236 |
| ypdA | 1779 NF |    | 2276 |
| lyxK | 1779 NF | NF |      |
| hyaE | 1779 NF |    | 2417 |
| pspD | 1779 NF |    | 1528 |
| yzgL | 1779 NF |    | 2207 |
| topB | 1779 NF |    | 1971 |
| cca  | 1779 NF |    | 1341 |
| ccmG | 1779 NF |    | 2240 |
| cobU | 1779 NF |    | 1910 |
| waaF | 1779 NF | NF |      |
| sbcD | 1779 NF |    | 2132 |
| yaiW | 1779 NF |    | 2034 |
| agaR | 1779 NF |    | 1548 |
| bamE | 1779 NF | NF |      |
| argE | 1779 NF |    | 2355 |
| yehD | 1779 NF |    | 692  |
| soxR | 1779 NF |    | 2669 |

|      |         |      |
|------|---------|------|
| recJ | 1779 NF | 1753 |
| moaA | 1779 NF | 1032 |
| hybE | 1779 NF | 1988 |
| creB | 1779 NF | 2480 |
| mhpF | 1779 NF | 1866 |
| dnaB | 1779 NF | 1990 |
| asnB | 1779 NF | 1203 |
| focB | 1779 NF | 1481 |
| waaG | 1779 NF | NF   |
| rpsN | 1779 NF | 398  |
| pitA | 1779 NF | 1959 |
| tpr  | 1779 NF | 1211 |
| yghF | 1779 NF | 1907 |
| iraD | 1779 NF | NF   |
| tehA | 1779 NF | 1822 |
| mhpT | 1779 NF | 1412 |
| ybbW | 1779 NF | 2314 |
| yoeB | 1779 NF | NF   |
| metI | 1779 NF | 1952 |
| cbrC | 1779 NF | 1835 |
| surA | 1779 NF | 2156 |
| idnD | 1779 NF | 2484 |
| araA | 1779 NF | 2643 |
| yidC | 1779 NF | 1331 |
| xylB | 1779 NF | 1998 |
| rutB | 1779 NF | 2182 |
| fldA | 1779 NF | 379  |
| recG | 1779 NF | 1225 |
| cdgR | 1779 NF | NF   |
| mltF | 1779 NF | NF   |
| pfkB | 1779 NF | 1045 |
| waaB | 1779 NF | NF   |
| yfgF | 1779 NF | 1555 |
| uspD | 1779 NF | 1159 |
| crr  | 1779 NF | 764  |
| ppsA | 1779 NF | NF   |
| xerD | 1779 NF | 2034 |
| glyA | 1779 NF | 1522 |
| yeaO | 1779 NF | 2151 |
| menA | 1779 NF | 2511 |
| yacC | 1779 NF | 1335 |
| wcaB | 1779 NF | 2354 |
| xerC | 1779 NF | 1621 |
| cydD | 1779 NF | 1331 |
| gspC | 1779 NF | 1973 |
| thiP | 1779 NF | 1306 |
| hyfA | 1779 NF | 2146 |
| pheL | 1779 NF | 2232 |
| argK | 1779 NF | 1800 |
| agaV | 1779 NF | 1940 |

|      |         |     |      |
|------|---------|-----|------|
| tgt  | 1779 NF |     | 2098 |
| rsmH | 1779 NF | NF  |      |
| moaC | 1779 NF |     | 1400 |
| tauC | 1779 NF |     | 1217 |
| metF | 1779 NF |     | 2173 |
| yegl | 1779 NF |     | 2351 |
| recO | 1779 NF |     | 1915 |
| creD | 1779 NF |     | 2166 |
| ddpD | 1779 NF |     | 2462 |
| bamD | 1779 NF |     | 861  |
| dmsD | 1779    | 115 | 883  |
| zntR | 1779 NF |     | 1984 |
| agaS | 1779 NF |     | 2392 |
| narU | 1779 NF |     | 2446 |
| rpmH | 1779 NF |     | 1582 |
| nupG | 1779 NF |     | 2050 |
| rutG | 1779 NF |     | 2421 |
| rpsP | 1779 NF |     | 1949 |
| lolA | 1779 NF |     | 1486 |
| ykfF | 1779 NF |     | 1300 |
| yehE | 1779 NF |     | 2129 |
| hslR | 1779 NF |     | 1680 |
| ilvD | 1779 NF |     | 2362 |
| murC | 1779 NF |     | 1099 |
| yicJ | 1779 NF |     | 635  |
| phoE | 1779 NF |     | 2214 |
| manA | 1779 NF |     | 1309 |
| ytjB | 1779 NF |     | 1300 |
| rffA | 1779 NF |     | 910  |
| aroF | 1779 NF |     | 2412 |
| cheY | 1779    | 90  | 418  |
| ftsL | 1779 NF |     | 213  |
| yicV | 1779 NF | NF  |      |
| acrB | 1779 NF |     | 1689 |
| csgC | 1779 NF |     | 1924 |
| polA | 1779 NF |     | 2102 |
| dinD | 1779 NF |     | 2047 |
| chiP | 1779 NF | NF  |      |
| rsmJ | 1779 NF | NF  |      |
| waaC | 1779 NF | NF  |      |
| acrF | 1779 NF |     | 956  |
| yjtD | 1779 NF |     | 1351 |
| rnIB | 1779 NF | NF  |      |
| rffT | 1779 NF |     | 1896 |
| puuP | 1779 NF |     | 2265 |
| pldA | 1779 NF |     | 1584 |
| cutC | 1779 NF |     | 1093 |
| pgpC | 1779 NF | NF  |      |
| xanP | 1779 NF | NF  |      |
| bsmA | 1779 NF | NF  |      |

|      |         |    |      |
|------|---------|----|------|
| hybF | 1779 NF |    | 2260 |
| glpX | 1779 NF |    | 1718 |
| lhr  | 1779 NF |    | 1941 |
| tonB | 1779 NF |    | 1686 |
| chbB | 1779 NF |    | 2105 |
| rimO | 1779 NF | NF |      |
| rlmE | 1779 NF | NF |      |
| yjJl | 1779 NF |    | 468  |
| mukF | 1779 NF |    | 2351 |
| feoC | 1779 NF |    | 2138 |
| yebG | 1779 NF |    | 1513 |
| ygfQ | 1779 NF |    | 2433 |
| rffG | 1779 NF |    | 2114 |
| araH | 1779 NF |    | 1217 |
| chpS | 1779 NF |    | 2300 |
| hicB | 1779 NF | NF |      |
| lipA | 1779 NF |    | 2047 |
| exuT | 1779 NF |    | 2173 |
| entB | 1779 NF |    | 1173 |
| agaD | 1779 NF |    | 1846 |
| cusB | 1779 NF |    | 2007 |
| tam  | 1779 NF |    | 2007 |
| fdnH | 1779 NF |    | 1307 |
| iadA | 1779 NF |    | 1377 |
| phnK | 1779 NF |    | 1885 |
| ykgL | 1779 NF |    | 1522 |
| hda  | 1779 NF |    | 398  |
| lptB | 1779 NF |    | 2162 |
| yeaE | 1779 NF |    | 1919 |
| chbF | 1779 NF |    | 1779 |
| waaJ | 1779 NF | NF |      |
| gspM | 1779 NF |    | 729  |
| phnL | 1779 NF |    | 2318 |
| waal | 1779 NF | NF |      |
| kdsA | 1789 NF |    | 1944 |
| bcsZ | 1789 NF |    | 1986 |
| agaW | 1789 NF |    | 2450 |
| lpxD | 1789 NF |    | 1757 |
| chbR | 1789 NF |    | 2674 |
| ynjH | 1789 NF |    | 959  |
| melB | 1789 NF |    | 1211 |
| yncD | 1789 NF |    | 1982 |
| ychO | 1789 NF |    | 2090 |
| nrdF | 1789 NF |    | 2318 |
| yfeY | 1791 NF |    | 2324 |
| gudP | 1791 NF |    | 1604 |
| hycl | 1792 NF |    | 2630 |
| phnP | 1796 NF |    | 2341 |
| pcm  | 1796 NF |    | 966  |
| nemA | 1796 NF |    | 1194 |

|        |         |    |      |
|--------|---------|----|------|
| ydjX   | 1796 NF |    | 750  |
| dsdX   | 1803 NF |    | 2411 |
| yebB   | 1803 NF |    | 2178 |
| ypjM_2 | 1803 NF | NF |      |
| kdsC   | 1803 NF |    | 750  |
| ycaR   | 1803 NF |    | 2080 |
| uidA   | 1803 NF |    | 1944 |
| metR   | 1803 NF |    | 2408 |
| yhdH   | 1811 NF |    | 2073 |
| folC   | 1811 NF |    | 1211 |
| kch    | 1811 NF |    | 2335 |
| purP   | 1811 NF | NF |      |
| araE   | 1811 NF |    | 2064 |
| cynX   | 1811 NF |    | 1940 |
| hisB   | 1811 NF |    | 2209 |
| ybaN   | 1811 NF |    | 2228 |
| ugpA   | 1818 NF |    | 1367 |
| plsB   | 1818 NF |    | 2134 |
| ybiH   | 1818 NF |    | 1695 |
| hycF   | 1818 NF |    | 2492 |
| ydiK   | 1818 NF |    | 2487 |
| rtcA   | 1818 NF |    | 2447 |
| rhaD   | 1818 NF |    | 2349 |
| pyrH   | 1825 NF |    | 313  |
| ruvB   | 1825 NF |    | 1141 |
| potI   | 1825 NF |    | 2359 |
| hyfI   | 1825 NF |    | 2428 |
| lolB   | 1825 NF |    | 1714 |
| hydN   | 1825 NF |    | 1444 |
| yieF   | 1825 NF |    | 2423 |
| ydeH   | 1836 NF |    | 2386 |
| uidB   | 1836 NF |    | 2018 |
| uxuB   | 1836 NF |    | 2494 |
| uxuA   | 1836 NF |    | 2496 |
| ptsN   | 1836 NF |    | 2489 |
| pspF   | 1836 NF |    | 2592 |
| ascB   | 1836 NF |    | 2437 |
| metC   | 1836 NF |    | 2454 |
| ftsH   | 1836 NF | NF |      |
| mazF   | 1836 NF | NF |      |
| malS   | 1836 NF |    | 2281 |
| mazE   | 3061 NF | NF |      |
| fsaA   | 3061 NF |    | 1638 |
| cedA   | 3061 NF |    | 2684 |
| ybaO   | 3061 NF |    | 1740 |
| yfcS   | 3061 NF | NF |      |
| ynfB   | 3061 NF |    | 1267 |
| allD   | 3061 NF |    | 2661 |
| rpmG   | 3061 NF |    | 1748 |
| leuT   | 3061 NF | NF |      |

|      |         |    |      |
|------|---------|----|------|
| yggR | 3061 NF |    | 2376 |
| cusA | 3061 NF | NF |      |
| wcaD | 3061 NF |    | 2581 |
| eutH | 3061 NF |    | 1702 |
| torY | 3061 NF |    | 1425 |
| cysS | 3061 NF |    | 333  |
| hisL | 3061 NF |    | 1115 |
| hcr  | 3061 NF |    | 2539 |
| sgcA | 3061 NF |    | 2240 |
| alaV | 3061 NF | NF |      |
| secB | 3061 NF |    | 238  |
| rhsB | 3061 NF |    | 908  |
| ybhO | 3061 NF |    | 2233 |
| rmuC | 3061 NF |    | 1024 |
| ycdT | 3061 NF |    | 2603 |
| prpE | 3061 NF |    | 1440 |
| yjgR | 3061 NF |    | 1076 |
| rrfD | 3061 NF | NF |      |
| lolD | 3061 NF |    | 1642 |
| fimG | 3061 NF |    | 2702 |
| ldcA | 3061 NF |    | 326  |
| copA | 3061 NF |    | 457  |
| aspC | 3061 NF |    | 1232 |
| yfdK | 3061 NF |    | 2645 |
| ygbA | 3061 NF |    | 2731 |
| rluD | 3061 NF |    | 650  |
| bioC | 3061 NF |    | 2694 |
| argQ | 3061 NF | NF |      |
| recB | 3061 NF |    | 2201 |
| caiC | 3061 NF |    | 2341 |
| btuD | 3061 NF |    | 1418 |
| artJ | 3061 NF |    | 2637 |
| glpC | 3061 NF |    | 2584 |
| apaH | 3061 NF |    | 2560 |
| leuS | 3061 NF |    | 1138 |
| dedD | 3061 NF |    | 1032 |
| dcrB | 3061 NF |    | 1592 |
| rlmB | 3061 NF |    | 1977 |
| maeB | 3061 NF |    | 940  |
| ycbB | 3061 NF |    | 2196 |
| tus  | 3061 NF |    | 982  |
| ompL | 3061 NF |    | 2344 |
| btuC | 3061 NF |    | 357  |
| yceF | 3061 NF |    | 307  |
| yihQ | 3061 NF |    | 683  |
| lptG | 3061 NF | NF |      |
| gmhB | 3061 NF |    | 1621 |
| yhhJ | 3061 NF |    | 1159 |
| pheM | 3061 NF |    | 2681 |
| menH | 3061 NF | NF |      |

|        |         |      |
|--------|---------|------|
| ispF   | 3061 NF | 1425 |
| allC   | 3061 NF | 2281 |
| ygbI   | 3061 NF | 345  |
| yfeK   | 3061 NF | 1880 |
| rplF   | 3061 NF | 409  |
| narY   | 3061 NF | 2556 |
| afuC   | 3061 NF | 2546 |
| hemD   | 3061 NF | 2192 |
| tolQ   | 3061 NF | 1954 |
| torZ   | 3061 NF | 2537 |
| galF   | 3061 NF | 196  |
| argZ   | 3061 NF | NF   |
| lepB   | 3061 NF | 1152 |
| rfbA   | 3061 NF | 1447 |
| deoC   | 3061 NF | 2586 |
| dcm    | 3061 NF | 1675 |
| hinT   | 3061 NF | 2086 |
| ygcP   | 3061 NF | 2532 |
| insB-2 | 3061 NF | NF   |
| yifL   | 3061 NF | NF   |
| yeaV   | 3061 NF | 1464 |
| ygfK   | 3061 NF | 683  |
| hycH   | 3061 NF | 2559 |
| rtcB   | 3061 NF | 1459 |
| alaA   | 3061 NF | NF   |
| dicA   | 3061 NF | 2050 |
| yodD   | 3061 NF | 516  |
| frvA   | 3061 NF | 2453 |
| tauA   | 3061 NF | 2697 |
| yffL   | 3061 NF | 2343 |
| sanA   | 3061 NF | 2365 |
| lgt    | 3061 NF | 1366 |
| sseA   | 3061 NF | 996  |
| tff    | 3061 NF | NF   |
| glxK   | 3061 NF | 2571 |
| aqpZ   | 3061 NF | 976  |
| mdtM   | 3061 NF | 1875 |
| cyaY   | 3061 NF | 768  |
| gadY   | 3061 NF | NF   |
| yjjP   | 3061 NF | NF   |
| sibE   | 3061 NF | NF   |
| radA   | 3061 NF | 2060 |
| sgrS   | 3061 NF | NF   |
| pheU   | 3061 NF | NF   |
| tatA   | 3061 NF | 1576 |
| yehB   | 3061 NF | 1829 |
| speC   | 3061 NF | 2541 |
| rspA   | 3061 NF | 2597 |
| yegU   | 3061 NF | 2093 |
| uof    | 3061 NF | NF   |

|      |         |    |      |
|------|---------|----|------|
| cpsB | 3061 NF |    | 2569 |
| ileX | 3061 NF | NF |      |
| envY | 3061 NF |    | 996  |
| ynjD | 3061 NF |    | 1894 |
| menF | 3061 NF |    | 2217 |
| symR | 3061 NF | NF |      |
| alaW | 3061 NF | NF |      |
| ybfF | 3061 NF |    | 673  |
| sfmD | 3061 NF |    | 1812 |
| yebK | 3061 NF |    | 2185 |
| uup  | 3061 NF |    | 1839 |
| glmY | 3061 NF | NF |      |
| arnA | 3061 NF |    | 1256 |
| murE | 3061 NF |    | 2730 |
| ymfD | 3061 NF |    | 2219 |
| mrdA | 3061 NF |    | 2025 |
| yddb | 3061 NF |    | 1921 |
| cyaR | 3061 NF | NF |      |
| yhcD | 3061 NF |    | 1912 |
| gspE | 3061 NF |    | 1829 |
| adk  | 3061 NF |    | 178  |
| sibA | 3061 NF | NF |      |
| rrlH | 3061 NF | NF |      |
| yajC | 3061 NF |    | 1384 |
| yohF | 3061 NF |    | 572  |
| metT | 3061 NF | NF |      |
| ygiQ | 3061 NF |    | 1450 |
| ybcF | 3061 NF |    | 2681 |
| ydiJ | 3061 NF |    | 1107 |
| yggL | 3061 NF |    | 1113 |
| dinQ | 3061 NF | NF |      |
| yedP | 3061 NF |    | 503  |
| rrfE | 3061 NF | NF |      |
| leuD | 3061 NF |    | 2596 |
| mrdB | 3061 NF |    | 2368 |
| ytjC | 3061 NF |    | 428  |
| yjiQ | 3061 NF | NF |      |
| hofP | 3061 NF |    | 1555 |
| ftsE | 3061 NF |    | 1957 |
| glmZ | 3061 NF | NF |      |
| serT | 3061 NF | NF |      |
| lepA | 3061 NF |    | 831  |
| rrlE | 3061 NF | NF |      |
| dxr  | 3061 NF |    | 1638 |
| ydiS | 3061 NF |    | 2733 |
| proM | 3061 NF | NF |      |
| yebT | 3061 NF |    | 1459 |
| ptsP | 3061 NF |    | 1680 |
| fimA | 3061 NF | NF |      |
| yafD | 3061 NF |    | 2522 |



|      |         |      |
|------|---------|------|
| plsC | 3061 NF | 1768 |
| yjgH | 3061 NF | 868  |
| ileV | 3061 NF | NF   |
| glrR | 3061 NF | NF   |
| htgA | 3061 NF | NF   |
| ppx  | 3061 NF | 1364 |
| gsk  | 3061 NF | 1429 |
| rrfA | 3061 NF | NF   |
| hcaF | 3061 NF | 2389 |
| leuU | 3061 NF | NF   |
| nrfF | 3061 NF | 2357 |
| hyuA | 3061 NF | 2333 |
| yjaZ | 3061 NF | 2427 |
| ybhF | 3061 NF | 715  |
| thiI | 3061 NF | 1316 |
| vsr  | 3061 NF | 1835 |
| ycaO | 3061 NF | 2060 |
| ypeA | 3061 NF | 2255 |
| rhIE | 3061 NF | 2064 |
| pflD | 3061 NF | 2290 |
| bgIJ | 3061 NF | 2711 |
| ycjO | 3061 NF | NF   |
| gluQ | 3061 NF | NF   |
| rutE | 3061 NF | 2610 |
| yfcL | 3061 NF | 1753 |
| yneM | 3061 NF | NF   |
| ubiH | 3061 NF | 444  |
| elfC | 3061 NF | NF   |
| thiQ | 3061 NF | 2705 |
| ytfT | 3061 NF | 2544 |
| ybgK | 3061 NF | 768  |
| aas  | 3061 NF | 2036 |
| ybhJ | 3061 NF | 2281 |
| nadE | 3061 NF | 1578 |
| panC | 3061 NF | 2473 |
| rplK | 3061 NF | 229  |
| mdtB | 3061 NF | 2650 |
| puuE | 3061 NF | 1348 |
| ecpD | 3061 NF | 2692 |
| agaC | 3061 NF | 2593 |
| dbpA | 3061 NF | 1213 |
| glvG | 3061 NF | 2717 |
| rrlB | 3061 NF | NF   |
| dpiB | 3061 NF | 1729 |
| degQ | 3061 NF | 2391 |
| mog  | 3061 NF | 2286 |
| yfaY | 3061 NF | 2336 |
| ubiB | 3061 NF | 2119 |
| atl  | 3061 NF | NF   |
| lpxB | 3061 NF | 2416 |

|        |         |     |      |
|--------|---------|-----|------|
| dgoK   | 3061 NF |     | 1476 |
| caiD   | 3061 NF |     | 2652 |
| nanR   | 3061 NF |     | 2251 |
| dkgA   | 3061 NF |     | 1254 |
| oxyS   | 3061 NF | NF  |      |
| rplR   | 3061 NF |     | 924  |
| yejK   | 3061 NF |     | 700  |
| yccB   | 3061 NF | NF  |      |
| yeal   | 3061 NF |     | 1568 |
| yifE   | 3061 NF |     | 582  |
| fryA   | 3061 NF |     | 154  |
| lpxL   | 3061 NF |     | 858  |
| scpB   | 3061 NF |     | 2543 |
| norW   | 3061 NF | NF  |      |
| ybhR   | 3061 NF |     | 2129 |
| ycbJ   | 3061    | 110 | 78   |
| cho    | 3061 NF |     | 2295 |
| cmtA   | 3061 NF |     | 1287 |
| uhpA   | 3061 NF |     | 2034 |
| pscG   | 3061 NF | NF  |      |
| ddlA   | 3061 NF |     | 1933 |
| essD   | 3061 NF |     | 2617 |
| yjdl   | 3061 NF |     | 2122 |
| dgoT   | 3061 NF |     | 1510 |
| thrW   | 3061 NF | NF  |      |
| yncl   | 3061 NF |     | 2726 |
| gatR_1 | 3061 NF | NF  |      |
| micA   | 3061 NF | NF  |      |
| sibD   | 3061 NF | NF  |      |
| minD   | 3061 NF |     | 948  |
| gspK   | 3061 NF |     | 2139 |
| leuV   | 3061 NF | NF  |      |
| rppH   | 3061 NF |     | 745  |
| potE   | 3061 NF |     | 1919 |
| priB   | 3061 NF |     | 23   |
| micC   | 3061 NF | NF  |      |
| yoaG   | 3061 NF |     | 2632 |
| ygfZ   | 3061 NF |     | 1994 |
| lolE   | 3061 NF |     | 1263 |
| ydiB   | 3061 NF |     | 1695 |
| mltC   | 3061 NF |     | 2405 |
| yaeB   | 3061 NF |     | 610  |
| lpxC   | 3061 NF |     | 2422 |
| pspC   | 3061 NF |     | 2625 |
| recT   | 3061 NF |     | 2698 |
| nohA   | 3061 NF |     | 2457 |
| mdtA   | 3061 NF |     | 2628 |
| hofB   | 3061 NF |     | 2676 |
| zntA   | 3061 NF |     | 2290 |
| ydiZ   | 3061 NF |     | 582  |

|        |         |      |
|--------|---------|------|
| mdlA   | 3061 NF | 428  |
| gshB   | 3061 NF | 2547 |
| rrsA   | 3061 NF | NF   |
| leuZ   | 3061 NF | NF   |
| modF   | 3061 NF | 1729 |
| nudG   | 3061 NF | 2508 |
| ybiB   | 3061 NF | 1846 |
| aroC   | 3061 NF | 2403 |
| tolR   | 3061 NF | 1024 |
| cmoB   | 3061 NF | 1125 |
| fabD   | 3061 NF | 2256 |
| degS   | 3061 NF | 1007 |
| glnD   | 3061 NF | 1638 |
| hyfD   | 3061 NF | 2644 |
| mdlB   | 3061 NF | 2162 |
| cmtB   | 3061 NF | 2420 |
| rrsC   | 3061 NF | NF   |
| uhpB   | 3061 NF | 2070 |
| valX   | 3061 NF | NF   |
| ypjB   | 3061 NF | NF   |
| fcl    | 3061 NF | 2490 |
| thiD   | 3061 NF | 1292 |
| yjdC   | 3061 NF | 784  |
| cueR   | 3061 NF | 2117 |
| yebS   | 3061 NF | 2616 |
| csdE   | 3061 NF | 2550 |
| moeB   | 3061 NF | 1849 |
| ampD   | 3061 NF | 1935 |
| yiiD   | 3061 NF | 1605 |
| frr    | 3061 NF | 1173 |
| ygiS   | 3061 NF | 1927 |
| secY   | 3061 NF | 204  |
| endA   | 3061 NF | 2527 |
| msrC   | 3061 NF | NF   |
| azuC   | 3061 NF | NF   |
| insB-3 | 3061 NF | NF   |
| ybgP   | 3061 NF | 2729 |
| rlmM   | 3061 NF | NF   |
| aroE   | 3061 NF | 428  |
| suhB   | 3061 NF | 1276 |
| yodC   | 3061 NF | 1621 |
| bioF   | 3061 NF | 2043 |
| sbcB   | 3061 NF | 1735 |
| gsiA   | 3061 NF | 1684 |
| efeU_1 | 3061 NF | NF   |
| ykfH   | 3061 NF | NF   |
| insB-1 | 3061 NF | NF   |
| tas    | 3061 NF | 1197 |
| kdpF   | 3061 NF | NF   |
| yqaB   | 3061 NF | 1997 |

|      |         |      |
|------|---------|------|
| acpP | 3061 NF | 1050 |
| clpS | 3061 NF | 1757 |
| dedA | 3061 NF | 428  |
| argV | 3061 NF | NF   |
| leuX | 3061 NF | NF   |
| pinQ | 3061 NF | 2600 |
| yqiH | 3061 NF | 2527 |
| fabG | 3061 NF | 503  |
| gloB | 3061 NF | 2477 |
| ybaK | 3061 NF | 2448 |
| qmcA | 3061 NF | 1611 |
| hisD | 3061 NF | 1513 |
| yeeN | 3061 NF | 1787 |
| oxc  | 3061 NF | 1371 |
| arcB | 3061 NF | 1746 |
| ycfD | 3061 NF | 1314 |
| metZ | 3061 NF | NF   |
| sxy  | 3061 NF | 1777 |
| metV | 3061 NF | NF   |
| ampE | 3061 NF | 2638 |
| hemC | 3061 NF | 281  |
| yhbW | 3061 NF | 1414 |
| gspH | 3061 NF | NF   |
| ybeB | 3061 NF | 418  |
| yccS | 3061 NF | 1551 |
| ghrA | 3061 NF | 1532 |
| hisG | 3061 NF | 1327 |
| ribC | 3061 NF | 1571 |
| ybeZ | 3061 NF | 2653 |
| cdsA | 3061 NF | 1505 |
| gntT | 3061 NF | 2437 |
| yjiC | 3061 NF | 2656 |
| tmcA | 3061 NF | NF   |
| slyD | 3061 NF | NF   |
| gltS | 3061 NF | 1803 |
| leuQ | 3061 NF | NF   |
| ydcJ | 3061 NF | 1935 |
| truA | 3061 NF | 1386 |
| fhuF | 3061 NF | 2407 |
| fryB | 3061 NF | 2314 |
| rcsF | 3061 NF | 1571 |
| cpsG | 3061 NF | 1532 |
| xdhD | 3061 NF | 1184 |
| thiM | 3061 NF | 1702 |
| secE | 3061 NF | 666  |
| rnpB | 3061 NF | NF   |
| yicI | 3061 NF | 2563 |
| hyaC | 3061 NF | 2651 |
| mobB | 3061 NF | 2465 |
| yjjW | 3061 NF | 2121 |

|      |         |     |      |
|------|---------|-----|------|
| ybgF | 3061 NF |     | 96   |
| alaT | 3061 NF | NF  |      |
| ssuB | 3061 NF |     | 2692 |
| trkA | 3061 NF |     | 1220 |
| valV | 3061 NF | NF  |      |
| ybdF | 3061 NF |     | 1510 |
| barA | 3061 NF |     | 1405 |
| pflC | 3061 NF |     | 2608 |
| rsxE | 3061 NF |     | 2078 |
| ppsR | 3061 NF | NF  |      |
| mraY | 3061 NF |     | 2563 |
| nudE | 3061 NF |     | 854  |
| ypdB | 3061 NF |     | 1960 |
| yedD | 3061 NF |     | 2016 |
| priA | 3061 NF |     | 1159 |
| eutD | 3061 NF | NF  |      |
| serB | 3061 NF | NF  |      |
| csiR | 3061 NF |     | 2174 |
| abgA | 3061 NF |     | 1287 |
| yafV | 3061 NF |     | 2384 |
| mscS | 3061 NF |     | 457  |
| recC | 3061 NF |     | 2471 |
| tdk  | 3061 NF |     | 2322 |
| panD | 3061 NF |     | 1883 |
| yecC | 3061 NF |     | 1610 |
| folP | 3061 NF |     | 2163 |
| mntR | 3061 NF |     | 2425 |
| cobB | 3061 NF |     | 2117 |
| selA | 3061 NF |     | 1684 |
| yecS | 3061 NF |     | 1478 |
| puuB | 3061 NF |     | 1953 |
| flk  | 3061 NF |     | 1862 |
| hicA | 3061 NF | NF  |      |
| mngB | 3061 NF |     | 2581 |
| phnM | 3061 NF |     | 2212 |
| yaeQ | 3061 NF |     | 1883 |
| lysS | 3061    | 100 | 568  |
| hsdR | 3061 NF |     | 1746 |
| dcd  | 3061 NF |     | 1707 |
| rzpD | 3061 NF |     | 2534 |
| aes  | 3061 NF |     | 2429 |
| pdxY | 3061 NF |     | 1396 |
| ssuA | 3061 NF |     | 2393 |
| hyaD | 3061 NF |     | 2552 |
| yehU | 3061 NF |     | 1659 |
| ybgL | 3061 NF |     | 2327 |
| rfaH | 3061 NF |     | 1779 |
| yebO | 3061 NF |     | 1306 |
| torS | 3061 NF |     | 602  |
| rsxG | 3061 NF |     | 2182 |

|        |         |    |      |
|--------|---------|----|------|
| fdhE   | 3061 NF |    | 635  |
| torT   | 3061 NF |    | 2395 |
| yjiY   | 3061 NF |    | 2308 |
| add    | 3061 NF |    | 564  |
| metG   | 3061 NF |    | 196  |
| sapC   | 3061 NF |    | 1138 |
| lptE   | 3061 NF | NF |      |
| dgoA   | 3061 NF | NF |      |
| zur    | 3061 NF |    | 1078 |
| lysV   | 3061 NF | NF |      |
| rsmG   | 3061 NF | NF |      |
| citX   | 3061 NF |    | 2575 |
| ygfF   | 3061 NF |    | 1616 |
| pIdB   | 3061 NF |    | 621  |
| aspS   | 3061 NF |    | 1118 |
| insA-2 | 3061 NF | NF |      |
| serW   | 3061 NF | NF |      |
| ribB   | 3061 NF |    | 838  |
| rybB   | 3061 NF | NF |      |
| yrbN   | 3061 NF | NF |      |
| yrfF   | 3061 NF |    | 2134 |
| yiiM   | 3061 NF |    | 2407 |
| ucpA   | 3061 NF |    | 692  |
| ryjB   | 3061 NF | NF |      |
| rnhA   | 3061 NF |    | 729  |
| fixC   | 3061 NF |    | 2276 |
| sapD   | 3061 NF |    | 1805 |
| alsK   | 3061 NF |    | 2582 |
| rutA   | 3061 NF |    | 2343 |
| parE   | 3061    | 56 | 1510 |
| pdxJ   | 3061 NF |    | 2433 |
| grxA   | 3061 NF |    | 1549 |
| yfeA   | 3061 NF |    | 1429 |
| dinI   | 3061 NF |    | 1453 |
| yggG   | 3061 NF |    | 2245 |
| leuA   | 3061 NF |    | 2679 |
| yigP   | 3061 NF |    | 550  |
| ygfB   | 3061 NF |    | 1263 |
| murA   | 3061 NF |    | 1843 |
| yjeV   | 3061 NF | NF |      |
| ybiC   | 3061 NF |    | 1314 |
| ygdG   | 3061 NF |    | 2439 |
| pdxB   | 3061 NF |    | 602  |
| hemE   | 3061 NF |    | 1053 |
| secM   | 3061 NF |    | 1899 |
| norV   | 3061 NF |    | 2640 |
| frvX   | 3061 NF |    | 2714 |
| yehM   | 3061 NF |    | 2468 |
| gsiC   | 3061 NF |    | 2124 |
| wcaK   | 3061 NF | NF |      |

|        |         |    |      |
|--------|---------|----|------|
| ilvG_2 | 3061 NF | NF |      |
| hcaD   | 3061 NF |    | 673  |
| lfhA   | 3061 NF |    | 1009 |
| nth    | 3061 NF |    | 1341 |
| lpxP   | 3061 NF |    | 468  |
| yicR   | 3061 NF |    | 75   |
| ileU   | 3061 NF | NF |      |
| yeaZ   | 3061 NF |    | 598  |
| ygeR   | 3061 NF |    | 1791 |
| insA-3 | 3061 NF | NF |      |
| ydcZ   | 3061 NF |    | 2090 |
| lit    | 3061 NF | NF |      |
| eutM   | 3061 NF | NF |      |
| tfaE   | 3061 NF |    | 2020 |
| diaA   | 3061 NF |    | 1132 |
| araD   | 3061 NF |    | 2217 |
| pepN   | 3061 NF |    | 1425 |
| hycA   | 3061 NF |    | 2105 |
| yehT   | 3061 NF |    | 1113 |
| yddG   | 3061 NF |    | 2495 |
| uhpC   | 3061 NF |    | 2022 |
| msbA   | 3061 NF |    | 1331 |
| yjiP   | 3061 NF |    | 2325 |
| rrsB   | 3061 NF | NF |      |
| yegQ   | 3061 NF |    | 645  |
| holD   | 3061 NF |    | 686  |
| leuP   | 3061 NF | NF |      |
| tisB   | 3061 NF | NF |      |
| ycbX   | 3061 NF |    | 1346 |
| envR   | 3061 NF |    | 1835 |
| elfD   | 3061 NF | NF |      |
| ycgM   | 3061 NF |    | 883  |
| ykfG   | 3061 NF |    | 2535 |
| ssuE   | 3061 NF |    | 2625 |
| ydfE   | 3061 NF |    | 2721 |
| ymfS   | 3061 NF |    | 1377 |
| ydcL   | 3061 NF |    | 610  |
| cnu    | 3061 NF |    | 998  |
| mdfA   | 3061 NF | NF |      |
| surE   | 3061 NF |    | 1812 |
| pgk    | 3061 NF |    | 2509 |
| gfcD   | 3061 NF |    | 2484 |
| pabC   | 3061 NF |    | 1474 |
| cdh    | 3061 NF |    | 2121 |
| allE   | 3061 NF | NF |      |
| gatR_2 | 3061 NF | NF |      |
| argB   | 3061 NF |    | 2513 |
| pgsA   | 3061 NF |    | 1322 |
| ychn   | 3061 NF |    | 2346 |
| fabR   | 3061 NF |    | 1039 |

|        |         |      |
|--------|---------|------|
| ycjV   | 3061 NF | 2724 |
| yphH   | 3061 NF | 2238 |
| avtA   | 3061 NF | 2047 |
| rhsA   | 3061 NF | 898  |
| leuW   | 3061 NF | NF   |
| rfbC   | 3061 NF | 1188 |
| allS   | 3061 NF | 2685 |
| thiL   | 3061 NF | 2065 |
| yghX_2 | 3061 NF | NF   |
| fre    | 3061 NF | 2491 |
| insF-4 | 3061 NF | NF   |
| fimD   | 3061 NF | 2564 |
| ygcW   | 3061 NF | 891  |
| relA   | 3061 NF | 2071 |
| chaC   | 3061 NF | 2634 |
| nudJ   | 3061 NF | 1929 |
| rplY   | 3061 NF | 966  |
| ycgG   | 3061 NF | 2203 |
| ydhR   | 3061 NF | 1993 |
| gudD   | 3061 NF | 2090 |
| ddpF   | 3061 NF | 2622 |
| fimC   | 3061 NF | NF   |
| plsX   | 3061 NF | 288  |
| yihO   | 3061 NF | 2599 |
| micM   | 3061 NF | NF   |
| slyA   | 3061 NF | 2094 |
| yheT   | 3061 NF | 1568 |
| tmk    | 3061 NF | 1505 |
| talB   | 3061 NF | 1724 |
| yfdH   | 3061 NF | 1493 |
| rdlD   | 3061 NF | NF   |
| murl   | 3061 NF | 1621 |
| yhiN   | 3061 NF | 868  |
| gltT   | 3061 NF | NF   |
| mrcA   | 3061 NF | 1163 |
| dnaT   | 3061 NF | NF   |
| yqiG   | 3061 NF | 1421 |
| qor    | 3061 NF | 1203 |
| ydeT   | 3061 NF | 2664 |
| ynjE   | 3061 NF | 480  |
| yjjQ   | 3061 NF | NF   |
| rdgC   | 3061 NF | 2146 |
| ydcP   | 3061 NF | 1019 |
| yciT   | 3061 NF | 993  |
| ybdZ   | 3061 NF | NF   |
| recE   | 3061 NF | 1624 |
| proK   | 3061 NF | NF   |
| yngC   | 3061 NF | 2659 |
| hemB   | 3061 NF | 722  |
| rhtB   | 3061 NF | 1859 |



|      |         |    |      |
|------|---------|----|------|
| fabF | 3061 NF |    | 868  |
| dnaC | 3061 NF | NF |      |
| wzc  | 3061 NF |    | 2700 |
| menD | 3061 NF |    | 1984 |
| rrrD | 3061 NF | NF |      |
| pal  | 3061 NF |    | 784  |
| asnT | 3061 NF | NF |      |
| potB | 3061 NF |    | 186  |
| ubiE | 3061 NF |    | 2479 |
| yacF | 3061 NF |    | 2364 |
| yciA | 3061 NF |    | 1859 |
| fimZ | 3061 NF |    | 2517 |
| gltW | 3061 NF | NF |      |
| ykgO | 3061 NF | NF |      |
| pepQ | 3061 NF |    | 137  |
| lpp  | 3061 NF |    | 700  |
| gcvB | 3061 NF | NF |      |
| rihC | 3061 NF |    | 711  |
| eutG | 3061 NF |    | 2327 |
| asnV | 3061 NF | NF |      |
| fdoI | 3061 NF |    | 1173 |
| ykgR | 3061 NF | NF |      |
| grxB | 3061 NF |    | 281  |
| tauD | 3061 NF |    | 2642 |
| purU | 3061 NF |    | 386  |
| ydaM | 3061 NF |    | 2255 |
| phnG | 3061 NF |    | 2612 |
| tldD | 3061 NF |    | 1722 |
| lafU | 3061 NF |    | 2550 |
| ytfL | 3061 NF |    | 1642 |
| rutD | 3061 NF |    | 2474 |
| hscC | 3061 NF |    | 2381 |
| kdpD | 3061 NF |    | 2696 |
| feaB | 3061 NF |    | 2556 |
| tusD | 3061 NF | NF |      |
| sbcC | 3061 NF |    | 2373 |
| yhbV | 3061 NF |    | 1163 |
| fabI | 3061 NF |    | 281  |
| ppiC | 3061 NF |    | 1825 |
| nagK | 3061 NF |    | 1163 |
| rrfB | 3061 NF | NF |      |
| sbp  | 3061 NF |    | 221  |
| pdxH | 3061 NF |    | 733  |
| ybjE | 3061 NF |    | 1184 |
| ftsX | 3061 NF |    | 1614 |
| yohH | 3061 NF | NF |      |
| rhIB | 3061 NF |    | 2114 |
| fepG | 3061 NF |    | 2620 |
| aspV | 3061 NF | NF |      |
| ybhS | 3061 NF |    | 1997 |

|        |         |    |      |
|--------|---------|----|------|
| yjiA   | 3061 NF | NF |      |
| yihP   | 3061 NF |    | 920  |
| adhP   | 3061 NF |    | 546  |
| accD   | 3061 NF | NF |      |
| insE-4 | 3061 NF | NF |      |
| mmuP   | 3061 NF |    | 745  |
| alr    | 3061 NF |    | 1007 |
| uvrA   | 3061 NF |    | 1746 |
| kdgK   | 3061 NF |    | 2060 |
| ydcM   | 3061 NF |    | 1814 |
| ryhB   | 3061 NF | NF |      |
| rrlD   | 3061 NF | NF |      |
| bisC   | 3061 NF |    | 2055 |
| renD   | 3061 NF |    | 1974 |
| yehR   | 3061 NF |    | 2728 |
| yncH   | 3061 NF | NF |      |
| yghA   | 3061 NF |    | 792  |
| recD   | 3061 NF |    | 2364 |
| tyrV   | 3061 NF | NF |      |
| mIaD   | 3061 NF | NF |      |
| hycB   | 3061 NF |    | 2675 |
| argU   | 3061 NF | NF |      |
| rrlG   | 3061 NF | NF |      |
| purC   | 3061 NF |    | 2331 |
| yChQ   | 3061 NF |    | 2312 |
| ydjL   | 3061 NF |    | 1655 |
| ybgJ   | 3061 NF |    | 1528 |
| ghrB   | 3061 NF |    | 1074 |
| tusE   | 3061 NF | NF |      |
| yraJ   | 3061 NF |    | 2381 |
| fbp    | 3061 NF |    | 1244 |
| holA   | 3061 NF |    | 1015 |
| ilvH   | 3061 NF |    | 2518 |
| acrD   | 3061 NF |    | 2641 |
| fdhD   | 3061    | 67 | 645  |
| ydeK   | 3061 NF |    | 557  |
| lysT   | 3061 NF | NF |      |
| rpmF   | 3061 NF |    | 626  |
| kdsD   | 3061 NF |    | 2114 |
| pyrE   | 3061 NF |    | 1220 |
| ypfN   | 3061 NF | NF |      |
| ssuD   | 3061 NF |    | 2595 |
| ridA   | 3061 NF | NF |      |
| folB   | 3061 NF |    | 1295 |
| tatB   | 3061 NF |    | 838  |
| gsiD   | 3061 NF |    | 2322 |
| ushA   | 3061 NF |    | 2061 |
| edd    | 3061 NF |    | 2413 |
| ycjY   | 3061 NF |    | 2052 |
| ddpA   | 3061 NF |    | 2459 |

|      |         |      |
|------|---------|------|
| ygbK | 3061 NF | 2574 |
| tilS | 3061 NF | 1871 |
| yagE | 3061 NF | NF   |
| agal | 3061 NF | 2147 |
| ebgR | 3061 NF | 898  |
| lysW | 3061 NF | NF   |
| ydhl | 3061 NF | 1631 |
| glyX | 3061 NF | NF   |
| tktA | 3061 NF | 940  |
| yeaJ | 3061 NF | 1493 |
| alaS | 3061 NF | 1659 |
| menE | 3061 NF | 1704 |
| yggN | 3061 NF | 2146 |
| ftsY | 3061 NF | 1587 |
| mltD | 3061 NF | 391  |
| rlpA | 3061 NF | 1166 |
| zapB | 3061 NF | NF   |
| fryC | 3061 NF | 1768 |
| thrL | 3061 NF | 1926 |
| pbpG | 3061 NF | 1322 |
| mnmC | 3061 NF | 2070 |
| mutH | 3061 NF | 2558 |
| yeaW | 3061 NF | 1528 |
| yhiR | 3061 NF | 2399 |
| ynbC | 3061 NF | 1665 |
| dipZ | 3061 NF | 1990 |
| elaB | 3061 NF | 117  |
| obgE | 3061 NF | 1841 |
| gpp  | 3061 NF | 2445 |
| yfbU | 3061 NF | 872  |
| phnN | 3061 NF | 2722 |
| yqjD | 3061 NF | 868  |
| glmM | 3061 NF | 828  |
| ydeU | 3061 NF | 260  |
| ycaK | 3061 NF | 2576 |
| lpxK | 3061 NF | 656  |
| citF | 3061 NF | 2550 |
| ubiF | 3061 NF | 2362 |
| gmd  | 3061 NF | 1039 |
| miaB | 3061 NF | 700  |
| srmB | 3061 NF | 2162 |
| abgT | 3061 NF | 645  |
| asnS | 3061 NF | 196  |
| ydiR | 3061 NF | NF   |
| abgB | 3061 NF | 1364 |
| bglB | 3061 NF | 2196 |
| gudX | 3061 NF | 1035 |
| rhaM | 3061 NF | 2566 |
| cueO | 3061 NF | 2437 |
| ebgA | 3061 NF | 2556 |

|        |         |    |      |
|--------|---------|----|------|
| yjgA   | 3061    | 56 | 23   |
| ygeH   | 3061 NF |    | 2567 |
| ypdE   | 3061 NF |    | 2224 |
| eutC   | 3061 NF |    | 1626 |
| yicC   | 3061 NF |    | 673  |
| lpxM   | 3061 NF |    | 598  |
| lrhA   | 3061 NF |    | 1379 |
| rpmD   | 3061 NF |    | 792  |
| ybjD   | 3061 NF |    | 1906 |
| nadA   | 3061 NF |    | 2679 |
| rpiA   | 3061 NF |    | 578  |
| rrsD   | 3061 NF | NF |      |
| yeiG   | 3061 NF |    | 1032 |
| fimH   | 3061 NF |    | 2437 |
| rrfG   | 3061 NF | NF |      |
| cas2   | 3061 NF | NF |      |
| ycjP   | 3061 NF |    | 2607 |
| mgsA   | 3061 NF |    | 1306 |
| rrlA   | 3061 NF | NF |      |
| scpA   | 3061 NF |    | 2399 |
| rhsD   | 3061 NF |    | 2388 |
| epd    | 3061 NF |    | 2003 |
| yebV   | 3061 NF |    | 1152 |
| pyrG   | 3061 NF |    | 1432 |
| usg    | 3061 NF |    | 1977 |
| mcrC   | 3061 NF |    | 2540 |
| ppa    | 3061 NF |    | 1638 |
| erfK   | 3061 NF |    | 838  |
| racC   | 3061 NF |    | 943  |
| gldA   | 3061 NF |    | 409  |
| ligA   | 3061 NF |    | 2396 |
| selB   | 3061 NF |    | 2106 |
| trml   | 3061 NF |    | 2070 |
| ppdA   | 3061 NF |    | 2619 |
| bglA   | 3061 NF |    | 1803 |
| yibL   | 3061 NF |    | 1894 |
| tolA   | 3061 NF |    | 1522 |
| ymdB   | 3061 NF |    | 1774 |
| istR-2 | 3061 NF | NF |      |
| wbbK   | 3061 NF |    | 273  |
| ftsP   | 3061 NF |    | 2397 |
| rscC   | 3061 NF |    | 2066 |
| sapA   | 3061 NF |    | 418  |
| asd    | 3061 NF |    | 908  |
| ygfT   | 3061 NF |    | 1395 |
| tauB   | 3061 NF |    | 2723 |
| dnaQ   | 3061 NF |    | 1795 |
| frwC   | 3061 NF |    | 2141 |
| rrfH   | 3061 NF | NF |      |
| yjjZ   | 3061 NF | NF |      |

|        |      |    |      |
|--------|------|----|------|
| sdsQ   | 3061 | NF | NF   |
| mppA   | 3061 | NF | 1505 |
| greB   | 3061 | NF | 764  |
| nlpI   | 3061 | NF | 1287 |
| serV   | 3061 | NF | NF   |
| ilvG_1 | 3061 | NF | NF   |
| hcaB   | 3061 | NF | 2479 |
| ispU   | 3061 | NF | 1351 |
| yiaL   | 3061 | NF | 2629 |
| cynT   | 3061 | NF | 2657 |
| visC   | 3061 | NF | 724  |
| caiB   | 3061 | NF | 2569 |
| hisA   | 3061 | NF | 1668 |
| foID   | 3061 | NF | 1616 |
| tyrU   | 3061 | NF | NF   |
| dinG   | 3061 | NF | 2506 |
| rsgA   | 3061 | NF | 1913 |
| bioB   | 3061 | NF | NF   |
| rrsH   | 3061 | NF | NF   |
| atoS   | 3061 | NF | 1668 |
| yjdJ   | 3061 | NF | 800  |
| yafN   | 3061 | NF | 1113 |
| kefB   | 3061 | NF | 2043 |
| serX   | 3061 | NF | NF   |
| kefA   | 3061 | NF | 1574 |
| adrA   | 3061 | NF | 2521 |
| btuR   | 3061 | NF | 2137 |
| yhfG   | 3061 | NF | 800  |
| dmlA   | 3061 | NF | NF   |
| yaaW   | 3061 | NF | 2224 |
| pgpB   | 3061 | NF | 808  |
| mobA   | 3061 | NF | 716  |
| dosP   | 3061 | NF | NF   |
| hisP   | 3061 | NF | 2670 |
| yehY   | 3061 | NF | 2614 |
| rcnB   | 3061 | NF | NF   |
| pka    | 3061 | NF | NF   |
| insA-5 | 3061 | NF | NF   |
| pinR   | 3061 | NF | 2734 |
| glcF   | 3061 | NF | NF   |
| allB   | 3061 | NF | 2561 |
| rsxC   | 3061 | NF | 1689 |
| insE-2 | 3061 | NF | NF   |
| ymgD   | 3061 | NF | 1787 |
| rayT   | 3061 | NF | NF   |
| orn    | 3061 | NF | 2149 |
| gsiB   | 3061 | NF | 1429 |
| phnO   | 3061 | NF | 2525 |
| yeiE   | 3061 | NF | 2266 |
| glrK   | 3061 | NF | NF   |

|        |         |       |      |
|--------|---------|-------|------|
| dapF   | 3061 NF |       | 2362 |
| glnX   | 3061 NF | NF    |      |
| rplN   | 3061 NF |       | 391  |
| dgkA   | 3061 NF |       | 1071 |
| ileT   | 3061 NF | NF    |      |
| hyfJ   | 3061 NF |       | 2524 |
| csrA   | 3061 NF |       | 1374 |
| ispD   | 3061 NF |       | 1076 |
| lolC   | 3061 NF |       | 1408 |
| hmp    | 3061 NF |       | 1234 |
| insO-2 | 3061 NF | NF    |      |
| lplA   | 3061 NF |       | 868  |
| ohsC   | 3061 NF | NF    |      |
| dhaM   | 3061 NF |       | 2132 |
| wcal   | 3061 NF |       | 2456 |
| sapF   | 3061 NF |       | 1059 |
| rtcR   | 3061 NF |       | 2588 |
| malZ   | 3061 NF |       | 2532 |
| ydfD   | 3061 NF |       | 2732 |
| glyV   | 3061 NF | NF    |      |
| yfgM   | 3061 NF |       | 1064 |
| rpsR   | 3061 NF |       | 1414 |
| puuC   | 3061 NF |       | 2123 |
| ryfB   | 3061 NF | NF    |      |
| yfeS   | 3061 NF |       | 2679 |
| ydgJ   | 3061 NF |       | 1390 |
| yjdN   | 3061 NF |       | 2304 |
| pyrB   | 3061 NF |       | 96   |
| xylE   | 3061 NF |       | 2203 |
| ubiD   | 3061 NF |       | 2118 |
| ppdB   | 3061 NF |       | 2640 |
| ydfN   | 3061 NF |       | 2466 |
| ytfG   | 3061 NF |       | 1109 |
| rutF   | 3061 NF | NF    |      |
| pepB   | 3061 NF |       | 2188 |
| ydiE   | 3061 NF |       | 2577 |
| panE   | 3061 NF |       | 1295 |
| fau    | 3061    | 56 NF |      |
| yjjK   | 3061 NF |       | 2312 |
| znuC   | 3061 NF |       | 2471 |
| glyT   | 3061 NF | NF    |      |
| xapA   | 3061 NF |       | 2646 |
| pyrI   | 3061 NF |       | 23   |
| hemY   | 3061 NF |       | 1912 |
| argY   | 3061 NF | NF    |      |
| ttdR   | 3061 NF |       | 2190 |
| yfhM   | 3061 NF |       | 924  |
| gshA   | 3061 NF |       | 2294 |
| asnU   | 3061 NF | NF    |      |
| hofC   | 3061 NF |       | 2719 |

|      |         |    |      |
|------|---------|----|------|
| deoD | 3061 NF | NF |      |
| hisC | 3061 NF |    | 345  |
| yaiX | 3061 NF | NF |      |
| wza  | 3061 NF |    | 2318 |
| glf  | 3061 NF |    | 902  |
| ytfR | 3061 NF |    | 2403 |
| rluE | 3061 NF |    | 1084 |
| hyfB | 3061 NF |    | 2530 |
| omrA | 3061 NF | NF |      |
| fdoG | 3061 NF |    | 557  |
| yqhC | 3061 NF |    | 2339 |
| yhdW | 3061 NF |    | 2715 |
| ddpB | 3061 NF |    | 2699 |
| lpxH | 3061 NF |    | 147  |
| alpA | 3061 NF |    | 2268 |
| cmoA | 3061 NF |    | 1053 |
| valT | 3061 NF | NF |      |
| pssA | 3061 NF |    | 825  |
| fimI | 3061 NF |    | 2666 |
| yeil | 3061 NF |    | 1771 |
| spf  | 3061 NF | NF |      |
| thiG | 3061 NF |    | 2604 |
| secD | 3061 NF |    | 841  |
| hsdM | 3061 NF |    | 1633 |
| minE | 3061 NF |    | 1950 |
| rhcC | 3061 NF |    | 1665 |
| solA | 3061 NF |    | 1099 |
| hyaF | 3061 NF |    | 2530 |
| tdcR | 3061 NF |    | 2623 |
| osmY | 3061 NF | NF |      |
| kbaY | 3061 NF |    | 2612 |
| stfE | 3061 NF |    | 1847 |
| ygfU | 3061 NF |    | 2683 |
| aphA | 3061 NF |    | 1456 |
| ybgQ | 3061 NF |    | 2710 |
| ygbL | 3061 NF |    | 2109 |
| potA | 3061 NF |    | 288  |
| ssrS | 3061 NF | NF |      |
| pepP | 3061 NF |    | 1522 |
| gltV | 3061 NF | NF |      |
| cysE | 3061 NF |    | 1571 |
| proB | 3061 NF |    | 1354 |
| yhhW | 3061 NF |    | 2486 |
| ydiQ | 3061 NF |    | 2553 |
| viaA | 3061 NF |    | 1341 |
| yjbH | 3061 NF |    | 2263 |
| torD | 3061 NF |    | 2505 |
| mrcB | 3061 NF |    | 1852 |
| ygeG | 3061 NF |    | 2635 |
| wcaE | 3061 NF |    | 2507 |

|      |         |      |
|------|---------|------|
| dicB | 3061 NF | 2690 |
| galU | 3061 NF | 546  |
| uspG | 3061 NF | 398  |
| thiF | 3061 NF | 2250 |
| glyY | 3061 NF | NF   |
| torA | 3061 NF | 2693 |
| yejL | 3061 NF | 1592 |
| rlmH | 3061 NF | NF   |
| yaaU | 3061 NF | 2716 |
| ilvN | 3061 NF | NF   |
| valW | 3061 NF | NF   |
| valU | 3061 NF | NF   |
| potG | 3061 NF | 2485 |
| selD | 3061 NF | 1264 |
| puuR | 3061 NF | 1364 |
| lacA | 3061 NF | 2648 |
| glnU | 3061 NF | NF   |
| mepA | 3061 NF | 2475 |
| glnV | 3061 NF | NF   |
| yceA | 3061 NF | 940  |
| yfcZ | 3061 NF | 241  |
| ybjQ | 3061 NF | 2609 |
| yjbl | 3061 NF | 2265 |
| amiB | 3061 NF | 2520 |
| citD | 3061 NF | 715  |
| safA | 3061 NF | NF   |
| paoC | 3061 NF | NF   |
| trkH | 3061 NF | 1740 |
| ffh  | 3061 NF | 1555 |
| recQ | 3061 NF | 2503 |
| sspA | 3061 NF | 673  |
| symE | 3061 NF | 2688 |
| pncA | 3061 NF | 1435 |
| ygfM | 3061 NF | 1807 |
| yphG | 3061 NF | 2605 |
| hisR | 3061 NF | NF   |
| arnT | 3061 NF | 2461 |
| mdtQ | 3061 NF | 2226 |
| yegV | 3061 NF | 2720 |
| fadD | 3061 NF | 2686 |
| yjff | 3061 NF | 1383 |
| zraP | 3061 NF | 2713 |
| hcaC | 3061 NF | 2217 |
| eutB | 3061 NF | 1735 |
| ppk  | 3061 NF | 1831 |
| macA | 3061 NF | 1501 |
| prfB | 3061 NF | 2199 |
| yehX | 3061 NF | 2528 |
| prfC | 3061 NF | 1343 |
| hyi  | 3061 NF | 2571 |



|        |         |    |      |
|--------|---------|----|------|
| metW   | 3061 NF | NF |      |
| nfrA   | 3061 NF |    | 1986 |
| yehP   | 3061 NF |    | 2135 |
| yrbG   | 3061 NF |    | 2391 |
| ynjB   | 3061 NF |    | 792  |
| rsmD   | 3061 NF |    | 738  |
| phnF   | 3061 NF |    | 2534 |
| cusC   | 3061 NF |    | 2708 |
| cysZ   | 3061 NF |    | 1251 |
| holC   | 3061 NF |    | 2337 |
| thiH   | 3061 NF |    | 2668 |
| rsuA   | 3061 NF |    | 988  |
| mutY   | 3061 NF |    | 2173 |
| yjiN   | 3061 NF |    | 1435 |
| ypfH   | 3061 NF |    | 2205 |
| frwB   | 3061 NF |    | 2212 |
| bcsB   | 3061 NF |    | 1686 |
| yeeZ   | 3061 NF |    | 1173 |
| yjjX   | 3061 NF |    | 2499 |
| insG   | 3061 NF |    | 2706 |
| acpS   | 3061 NF |    | 2566 |
| lysC   | 3061 NF |    | 2433 |
| yhjD   | 3061 NF |    | 1470 |
| insA-1 | 3061 NF | NF |      |
| rsxB   | 3061 NF |    | 891  |
| yhbY   | 3061 NF |    | 93   |
| ygiD   | 3061 NF |    | 1489 |
| sfmC   | 3061 NF |    | 2658 |
| pabB   | 3061 NF |    | 1597 |
| gapC_2 | 3061 NF | NF |      |
| kdgT   | 3061 NF |    | 2484 |
| ydcU   | 3061 NF |    | 1358 |
| rydC   | 3061 NF | NF |      |
| nadR   | 3061 NF |    | 1537 |
| murB   | 3061 NF |    | 186  |
| yoaB   | 3061 NF |    | 953  |
| yjjV   | 3061 NF |    | 1714 |
| tabA   | 3061 NF | NF |      |
| murD   | 3061 NF |    | 2188 |
| yidR   | 3061 NF |    | 375  |
| yfcC   | 3061 NF |    | 1228 |
| ycbK   | 3061 NF |    | 516  |
| eutE   | 3061 NF |    | 2214 |
| emrY   | 3061 NF |    | 2687 |
| dfp    | 3061 NF |    | 891  |
| yggX   | 3061 NF |    | 487  |
| glyU   | 3061 NF | NF |      |
| hokE   | 3061 NF | NF |      |
| lar    | 3061 NF |    | 2070 |
| cysT   | 3061 NF | NF |      |

|        |         |    |      |
|--------|---------|----|------|
| yqcA   | 3061 NF |    | 2367 |
| ampG   | 3061 NF |    | 1597 |
| ydhK   | 3061 NF |    | 2109 |
| wzyE   | 3061 NF |    | 2248 |
| btuE   | 3061 NF |    | 800  |
| zipA   | 3061 NF |    | 1672 |
| gltU   | 3061 NF | NF |      |
| frmB   | 3061 NF |    | 313  |
| ytfE   | 3061 NF |    | 1997 |
| dacA   | 3061 NF |    | 908  |
| tatC   | 3061 NF |    | 1180 |
| gapC_1 | 3061 NF | NF |      |
| yqjA   | 3061 NF |    | 1823 |
| ydhB   | 3061 NF |    | 2615 |
| elbB   | 3061 NF |    | 615  |
| map    | 3061 NF |    | 1648 |
| frvB   | 3061 NF |    | 2621 |
| ppdC   | 3061 NF |    | 2394 |
| rrfC   | 3061 NF | NF |      |
| rcnR   | 3061 NF |    | 2709 |
| potD   | 3061 NF |    | 1074 |
| glnW   | 3061 NF | NF |      |
| metY   | 3061 NF | NF |      |
| yniA   | 3061 NF |    | 281  |
| ycil   | 3061 NF |    | 1205 |
| mcrB   | 3061 NF |    | 320  |
| yciB   | 3061 NF |    | 1940 |
| csgE   | 3061 NF |    | 2631 |
| trkG   | 3061 NF |    | 2228 |
| arnC   | 3061 NF |    | 2086 |
| yehC   | 3061 NF |    | 2664 |
| yciN   | 3061 NF |    | 2173 |
| aroD   | 3061 NF |    | 1254 |
| ilvX   | 3061 NF | NF |      |
| pgaC   | 3061 NF |    | 2542 |
| ybgC   | 3061 NF |    | 409  |
| serS   | 3061 NF |    | 758  |
| hrpB   | 3061 NF |    | 2626 |
| insF-2 | 3061 NF | NF |      |
| ykgE   | 3061 NF |    | 1783 |
| tesA   | 3061 NF |    | 1035 |
| fabH   | 3061 NF |    | 2180 |
| ydcY   | 3061 NF |    | 1680 |
| fusA   | 3061 NF |    | 2455 |
| argW   | 3061 NF | NF |      |
| metA   | 3061 NF |    | 2129 |
| pheV   | 3061 NF | NF |      |
| ispG   | 3061 NF |    | 2357 |
| yagF   | 3061 NF |    | 1107 |
| rfbB   | 3061 NF |    | 692  |

|      |         |      |
|------|---------|------|
| emrK | 3061 NF | 2539 |
| citG | 3061 NF | 2707 |
| ygdH | 3061 NF | 854  |
| nusG | 3061 NF | 917  |
| fsaB | 3061 NF | 1188 |
| cls  | 3061 NF | 2083 |
| ygiA | 3061 NF | NF   |
| yhjK | 3061 NF | 2613 |
| rrsG | 3061 NF | NF   |
| bhsA | 3061 NF | 1366 |
| glyW | 3061 NF | NF   |
| gspI | 3061 NF | 1184 |
| yihW | 3061 NF | 1819 |
| alaX | 3061 NF | NF   |
| ybbL | 3061 NF | 1808 |
| rrsE | 3061 NF | NF   |
| rimJ | 3061 NF | 1395 |
| rutC | 3061 NF | 1822 |
| folM | 3061 NF | 2348 |
| rplJ | 3061 NF | 1088 |
| ycbZ | 3061 NF | 966  |
| rrfF | 3061 NF | NF   |
| csdA | 3061 NF | 1774 |
| tyrT | 3061 NF | NF   |
| ybeY | 3061 NF | 2602 |
| yacG | 3061 NF | 966  |
| rfbD | 3061 NF | 1464 |
| fdoH | 3061 NF | 1147 |
| lpcA | 3061 NF | 2271 |
| yfcD | 3061 NF | 1327 |
| prIF | 3061 NF | NF   |
| yffS | 3061 NF | 2074 |
| gspL | 3061 NF | 2333 |
| yjbF | 3061 NF | 2385 |
| paoA | 3061 NF | NF   |
| rfaE | 3061 NF | 2169 |
| mdtL | 3061 NF | 352  |
| yigZ | 3061 NF | 527  |
| yphD | 3061 NF | 1831 |
| metU | 3061 NF | NF   |
| yaeJ | 3061 NF | 2551 |
| rep  | 3061 NF | 850  |
| yahl | 3061 NF | 971  |
| kefC | 3061 NF | 2655 |
| serU | 3061 NF | NF   |
| ykgF | 3061 NF | 204  |
| thrV | 3061 NF | NF   |
| gpsA | 3061 NF | 1276 |
| nlpA | 3061 NF | 2497 |
| dsdA | 3061 NF | 2245 |

|        |         |    |      |
|--------|---------|----|------|
| csrB   | 3061 NF | NF |      |
| yqeH   | 3061 NF |    | 1599 |
| eutN   | 3061 NF |    | 2654 |
| sspB   | 3061 NF |    | 940  |
| lptF   | 3061 NF | NF |      |
| smrB   | 3061 NF | NF |      |
| secF   | 3061 NF |    | 825  |
| kdpC   | 3061 NF |    | 2007 |
| yajR   | 3061 NF |    | 2226 |
| eutJ   | 3061 NF |    | 2016 |
| yeeJ   | 3061 NF |    | 2578 |
| yccE   | 3061 NF |    | 2633 |
| phnC   | 3061 NF |    | 2519 |
| ycaD   | 3061 NF |    | 2003 |
| proL   | 3061 NF | NF |      |
| ypjC   | 3061 NF |    | 2376 |
| ydiO   | 3061 NF |    | 800  |
| parC   | 3061 NF |    | 2647 |
| ydjI   | 3061 NF |    | 2472 |
| sibB   | 3061 NF | NF |      |
| ybdN   | 3061 NF |    | 2712 |
| wzb    | 3061 NF | NF |      |
| ygaZ   | 3061 NF |    | 2401 |
| glnE   | 3061 NF |    | 683  |
| hycE   | 3061 NF |    | 2727 |
| mutM   | 3061 NF |    | 2458 |
| rimN   | 3061 NF |    | 940  |
| sthA   | 3061 NF |    | 111  |
| emrB   | 3061 NF |    | 1835 |
| ydjM   | 3061 NF |    | 1812 |
| prmB   | 3061 NF |    | 2273 |
| insN-1 | 3061 NF | NF |      |
| ryfD   | 3061 NF | NF |      |
| def    | 3061 NF |    | 2382 |
| prpC   | 3061 NF |    | 2414 |
| deoR   | 3061 NF |    | 758  |
| pnuC   | 3061 NF |    | 2207 |
| thyA   | 3061 NF |    | 645  |
| iraM   | 3061 NF | NF |      |
| rihA   | 3061 NF |    | 891  |
| tolB   | 3061 NF |    | 125  |
| yjaG   | 3061 NF |    | 1287 |
| yraP   | 3061 NF |    | 1113 |
| yfcE   | 3061 NF |    | 626  |
| ybbP   | 3061 NF |    | 2300 |
| rng    | 3061 NF |    | 2245 |
| yheS   | 3061 NF |    | 1700 |
| tolC   | 3061 NF |    | 2401 |
| ygiI   | 3061 NF |    | 557  |
| sad    | 3061 NF |    | 1875 |

|        |         |      |
|--------|---------|------|
| yidH   | 3061 NF | 2619 |
| aat    | 3061 NF | 1957 |
| hcaE   | 3061 NF | 2537 |
| ecnB   | 3061 NF | NF   |
| rprA   | 3061 NF | NF   |
| pflA   | 3061 NF | 527  |
| alaU   | 3061 NF | NF   |
| afuB   | 3061 NF | 920  |
| yjcC   | 3061 NF | 2573 |
| minC   | 3061 NF | 1234 |
| rnt    | 3061 NF | 1903 |
| thiC   | 3061 NF | 1624 |
| nemR   | 3061 NF | NF   |
| hcaR   | 3061 NF | 940  |
| pdxK   | 3061 NF | 1720 |
| qseD   | 3061 NF | NF   |
| fixX   | 3061 NF | 2302 |
| ybiW   | 3061 NF | 2272 |
| frmA   | 3061 NF | 23   |
| nfrB   | 3061 NF | 1866 |
| argX   | 3061 NF | NF   |
| hcp    | 3061 NF | 838  |
| mnmA   | 3061 NF | 2152 |
| ydcF   | 3061 NF | 645  |
| chaB   | 3061 NF | 2011 |
| ftsN   | 3061 NF | 2162 |
| yidA   | 3061 NF | 2460 |
| ypjM_1 | 3061 NF | NF   |
| mIaF   | 3061 NF | NF   |
| yddW   | 3061 NF | 2388 |
| yadG   | 3061 NF | 2302 |
| rplI   | 3061 NF | 409  |
| pepE   | 3061 NF | 1358 |
| rrlC   | 3061 NF | NF   |
| yqeA   | 3061 NF | 2718 |
| mmuM   | 3061 NF | 2703 |
| guaC   | 3061 NF | 269  |
| ygaM   | 3061 NF | 204  |
| yhdZ   | 3061 NF | 1982 |
| intA   | 3061 NF | 1163 |
| yjiM   | 3061 NF | 2671 |
| valY   | 3061 NF | NF   |
| rsxD   | 3061 NF | 861  |
| hyfG   | 3061 NF | 2587 |
| sapB   | 3061 NF | 468  |
| yoaA   | 3061 NF | 2331 |
| ycdY   | 3061 NF | 1035 |
| proA   | 3061 NF | 1493 |
| nadD   | 3061 NF | 2371 |
| curA   | 3061 NF | NF   |

|      |         |    |      |
|------|---------|----|------|
| yrhJ | 3061 NF |    | 2662 |
| thrT | 3061 NF | NF |      |
| caiE | 3061 NF |    | 1852 |
| thiE | 3061 NF |    | 2572 |
| pta  | 3061 NF |    | 326  |
| mutT | 3061 NF |    | 2132 |
| thrU | 3061 NF | NF |      |
| chbG | 3061 NF |    | 2704 |
| yafZ | 3061 NF |    | 1646 |
| umuC | 3061 NF |    | 2590 |
| htrE | 3061 NF |    | 2665 |
| rspB | 3061 NF |    | 2725 |
| potC | 3061 NF |    | 11   |
